1           **A biomimetic five-module chimeric antigen receptor (<sup>5M</sup>CAR) designed to**  
2           **target and eliminate antigen-specific T cells**

3  
4  
5           Shio Kobayashi<sup>1,8</sup>, Martin A. Thelin<sup>1,8</sup>, Heather L. Parrish<sup>2</sup>, Neha R. Deshpande<sup>2</sup>,  
6           Mark S. Lee<sup>2</sup>, Alborz Karimzadeh<sup>1</sup>, Monika A. Niewczas<sup>3,4</sup>  
7           Thomas Serwold<sup>1,9\*</sup> and Michael S. Kuhns<sup>2,5,6,7,9\*</sup>  
8  
9

10       <sup>1</sup>Section of Immunobiology, Research Division, Joslin Diabetes Center, Harvard Medical School, Boston,  
11       MA, USA

12       <sup>2</sup>Department of Immunobiology, The University of Arizona College of Medicine, Tucson, AZ, USA

13       <sup>3</sup>Section on Genetics and Epidemiology, Research Division, Joslin Diabetes Center, Boston, MA, USA

14       <sup>4</sup>Harvard Catalyst – Biostatistical Consulting (Joslin Diabetes Center site), Boston, MA, USA

15       <sup>5</sup>The BIO-5 Institute, The University of Arizona College of Medicine, Tucson, AZ, USA

16       <sup>6</sup>The Arizona Center on Aging, The University of Arizona College of Medicine, Tucson, AZ, USA

17       <sup>7</sup>The University of Arizona Cancer Center, Tucson, AZ, USA

18       <sup>8</sup>These authors contributed equally.

19       <sup>9</sup>These authors contributed equally.

20  
21  
22       \*Co-corresponding authors:

23       [thomas.serwold@joslin.harvard.edu](mailto:thomas.serwold@joslin.harvard.edu) and [mkuhns@arizona.email.edu](mailto:mkuhns@arizona.email.edu)

24 **Abstract**

25 T cells express clonotypic T cell receptors (TCRs) that recognize peptide antigens in the  
26 context of class I or II MHC molecules (pMHCI/II). These receptor modules associate  
27 with three signaling modules (CD3 $\gamma\epsilon$ ,  $\delta\epsilon$ , and  $\zeta\zeta$ ), and work in concert with a coreceptor  
28 module (either CD8 or CD4), to drive T cell activation in response to pMHCI/II. Here we  
29 describe a first generation biomimetic 5-module chimeric antigen receptor (<sup>5M</sup>CAR). We  
30 show that: (i) chimeric receptor modules built with the ectodomains of pMHCII assemble  
31 with CD3 signaling modules into complexes that redirect cytotoxic T lymphocyte (CTL)  
32 specificity and function in response to the clonotypic TCRs of pMHCII-specific CD4<sup>+</sup> T  
33 cells; and, (ii) surrogate coreceptor modules enhance the function of these complexes.  
34 Furthermore, we demonstrate that adoptively transferred <sup>5M</sup>CAR-CTLs can mitigate type  
35 I diabetes by targeting autoimmune CD4<sup>+</sup> T cells in NOD mice. This work provides a  
36 framework for the construction of biomimetic <sup>5M</sup>CARs that can be used as tools to study  
37 the impact of particular antigen-specific T cells in immune responses, and may hold  
38 potential for ameliorating diseases mediated by pathogenic T cells.

39 **Main**

40 T cells scan major histocompatibility complex (MHC) molecules on the surfaces of cells  
41 for the presence of peptide antigens (pMHC) derived from microbes, vaccines, or tumor  
42 cells with their clonotypic T cell receptors (TCRs). If the dwell time of the TCR on the  
43 pMHC is of sufficient duration, a T cell will become activated and differentiate to helper  
44 (Th), cytotoxic (CTL), regulatory (Treg), or memory (Tm) T cells that are essential for  
45 long-lived immunity<sup>1,2</sup>. CD4<sup>+</sup> Th subsets provide help for effective CTL, B cell, and  
46 innate immune cell function upon immunologic challenge, Tregs are crucial for  
47 peripheral tolerance to self and commensal antigens, Tm allow for rapid antigen-specific  
48 responses, and CTLs can eliminate infected or cancerous cells<sup>3-6</sup>. However, the activity  
49 of each T cell subset can be counter-productive if conditions are such that they result in  
50 the induction of allergies, asthma, autoimmunity, transplant rejection, or, in the case of  
51 Tregs, the protection of tumors. Considerable effort has thus been focused on  
52 developing strategies to: determine how T cells of a particular pMHC-specificity impact  
53 an immune response; enhance T cell responses to fight infections or tumors; or,  
54 mitigate T cell-mediated pathologies.

55 Chimeric antigen receptors (CARs) have gained attention as a technology that  
56 can redirect T cell specificity and function for novel purposes (**Fig. 1a**). The archetypal  
57 CAR design consists of a single-chain module (referred to here as <sup>1</sup>M CARs) wherein  
58 ligand specificity (e.g. tumor antigens) is usually conferred via an antibody-derived Fv,  
59 while intracellular signaling is directed through a tandem array of known signaling  
60 motifs<sup>7,8</sup>. Work to improve <sup>1</sup>M CAR efficacy has resulted in the development and testing  
61 of numerous variations on the initial design, including fragmented domains that form

62  $1^{\text{M}}$ CARs upon final assembly<sup>8,9</sup>. Yet, despite these efforts,  $1^{\text{M}}$ CARs require ~100-1000  
63 fold more antigen to direct CTL responses than their natural counterpart<sup>9-11</sup>. Because  
64 the basic template of these *de novo* receptors was established before we better  
65 appreciated how natural receptors trigger,  $1^{\text{M}}$ CARs may lack the means to efficiently  
66 relay ligand-specific information across the cell membrane; thus, there may be practical  
67 limits to what can be achieved with variants of the archetypal  $1^{\text{M}}$ CAR design<sup>8,9,12</sup>.

68 An alternative approach is to employ biomimetic engineering to develop CARs  
69 that mirror the operating principles of the highly sensitive and specific 5-module  
70 receptors that have evolved to drive T cell response to pMHC. In brief, the TCR is the  
71 receptor module (module 1). It binds pMHC and relays information to the  
72 immunoreceptor tyrosine-based activation motifs (ITAMs) of the three associated  
73 signaling modules (CD3 $\gamma\epsilon$ ,  $\delta\epsilon$ , and  $\zeta\zeta$ ; modules 2-4)<sup>12,13</sup>. CD4 and CD8 are coreceptors  
74 that represent the fifth module on CD4<sup>+</sup> or CD8<sup>+</sup> T cells; they bind MHCII or MHCI,  
75 respectively, and associate non-covalently with the Src kinase, p56<sup>Lck</sup> (Lck), that  
76 phosphorylates CD3 ITAMs. The coreceptors sequester Lck away from TCR-CD3  
77 complexes until either CD4 or CD8 and the TCR both bind pMHC, at which point Lck is  
78 positioned proximal to the CD3 ITAMs to initiate signaling<sup>14-17</sup>. These 5-module pMHC-  
79 receptors can signal in response to a single agonist pMHC, direct CTL killing against  
80 just three pMHC, and direct distinct T cell responses according to the quantity and  
81 quality of the pMHC<sup>1,2,11,18-23</sup>. Given the extraordinary sensitivity, specificity, and cell  
82 fate-directing ability of the natural pMHC receptors, engineering biomimetic versions of  
83 multi-module CARs could expand and enhance the applications of CAR-T cell therapy.

84 To this end we engineered a 5-module chimeric antigen receptor (<sup>5M</sup>CAR) system  
85 based on the operating principles of the multi-module receptors that have evolved to  
86 direct T cell responses to pMHC. Specifically, we designed a Chimeric Receptor Module  
87 (CRM) built with the ectodomain of pMHCII (CRM<sup>pMHCII</sup>) to associate with the three CD3  
88 signaling modules. This design maintained the natural receptor:ligand binding kinetics  
89 that drive T cell activation, and enabled us to redirect CTL specificity against clonotypic  
90 TCRs expressed by pathogenic T cells. We also engineered a surrogate coreceptor  
91 (ScoR) composed of CD80 fused to Lck as the fifth module of our <sup>5M</sup>CAR. We report  
92 that <sup>5M</sup>CAR-T cell hybridomas make IL-2 in a ligand-specific (i.e. TCR-specific) manner,  
93 that <sup>5M</sup>CAR-CTLs can kill CD4<sup>+</sup> T cells both *in vitro* and *in vivo* in a TCR-specific  
94 manner, and that <sup>5M</sup>CAR-CTLs targeting autoimmune CD4<sup>+</sup> T cells can prevent disease  
95 in non-obese diabetic (NOD) mouse models. Our results demonstrate that biomimetic  
96 <sup>5M</sup>CARs can redirect CTL specificity and function for novel applications. They also  
97 provide data suggesting that the current design could be used therapeutically to mitigate  
98 diseases caused by pathogenic T cells.

99

## 100 **Results**

101

### 102 **Design and *in vitro* characterization of a 1<sup>st</sup> generation <sup>5M</sup>CAR**

103 When designing our 1<sup>st</sup> generation <sup>5M</sup>CAR, we decided to maintain pMHCII-TCR  
104 interactions as the core receptor-ligand recognition event. Doing so allowed us to  
105 preserve the key biophysical properties that have evolved to mediate antigen

106 recognition. Using this strategy, we generated a <sup>5M</sup>CAR system with the potential to  
107 redirect CTLs to target and kill CD4<sup>+</sup> T cells via recognition of their clonotypic TCRs.

108 First, we engineered a pMHCII-based chimeric receptor module (CRM<sup>pMHCII</sup>,  
109 module 1) to assemble with the CD3 $\gamma\epsilon$ ,  $\delta\epsilon$ , and  $\zeta\zeta$  signaling modules (modules 2-4) into  
110 a functional complex (**Fig. 1b and sFig. 1**). The basic design for all CRM<sup>pMHCII</sup> modules  
111 used herein involved fusing the MHCII $\alpha$  and MHCII $\beta$  ectodomains (ECDs) to the  
112 connecting peptides (CP), transmembrane domains (TMD), and intracellular domains  
113 (ICD) of the TCR $\alpha$  and TCR $\beta$  subunits, respectively. The peptide antigen was N-  
114 terminally tethered to the MHCII $\beta$  region to ensure expression of a single CRM<sup>pMHCII</sup>  
115 species, while mEGFP was tethered at the C-terminus to aid in detection. We expected  
116 the CRM<sup>pMHCII</sup> to assemble with the CD3 $\gamma\epsilon$ ,  $\delta\epsilon$ , and  $\zeta\zeta$  modules via interactions in the  
117 CP and TMD, and provide specificity for cognate TCRs.

118 We also engineered a surrogate coreceptor (ScoR) composed of the CD80 ECD  
119 and TMD fused to Lck (module 5). CD80 naturally interacts with CD28 on naïve T cells  
120 as well as CTLA-4 on antigen experienced T cells. The underlying logic for this design is  
121 that because CD28, CTLA-4, and the TCR are reported to inhabit similar microdomains  
122 early during immunological synapse formation, a CD80-Lck fusion would bind its pairing  
123 partners and localize Lck in proximity to the pMHCR-CD3 complex (**Fig. 1b and sFig.**  
124 **1**)<sup>24,25</sup>.

125 To evaluate the expression and function of our prototype <sup>5M</sup>CAR components we  
126 retrovirally transduced 58 $\alpha$  $\beta$ <sup>-</sup> cells (a T cell hybridoma line that lacks TCR $\alpha$  and  
127 TCR $\beta$ <sup>26</sup>) to express both the CRM<sup>pMHCII</sup> and the CD80-Lck ScoR. The CRM<sup>pMHCII</sup> was  
128 built using the murine MHCII I-E<sup>k</sup> presenting the model peptide moth cytochrome C

129 (MCC<sub>88-103</sub>; MCC:I-E<sup>K</sup>). Flow cytometry analysis revealed cell surface expression of  
130 MCC:I-E<sup>k</sup>, CD3 $\epsilon$ , and CD80 on the transduced but not parental 58 $\alpha$ <sup>-</sup> $\beta$ <sup>-</sup> cells (**Fig 1c**).  
131 The proportional expression of MCC:I-E<sup>k</sup> and CD3 $\epsilon$  suggested that the CRM<sup>pMHCII</sup>  
132 module was assembling with the CD3 modules.

133 We also performed a flow cytometry-based fluorophore-linked immunosorbant  
134 assay (FFLISA) of detergent lysates from TCR<sup>+</sup> and 5<sup>M</sup>CAR<sup>+</sup> 58 $\alpha$ <sup>-</sup> $\beta$ <sup>-</sup> cells to confirm that  
135 TCR-CD3 and CRM<sup>pMHCII</sup>-CD3 complexes assemble analogously<sup>14</sup>. Latex beads coated  
136 with anti-CD3 $\epsilon$  monoclonal antibodies (mAbs) were incubated with lysates and then  
137 stained with anti-CD3 $\zeta$  antibodies for analysis by flow cytometry. The TCR-CD3<sup>+</sup> and  
138 CRM<sup>pMHCII</sup>-CD3<sup>+</sup> samples showed similar levels of GFP and CD3 $\zeta$  signal (**Fig. 1d**),  
139 demonstrating that the TCR $\beta$ -GFP and MHCII $\beta$ -GFP co-immunoprecipitate (IP) with  
140 both CD3 $\epsilon$  and CD3 $\zeta$  subunits at similar levels.

141 To evaluate if our 5<sup>M</sup>CAR<sup>+</sup> 58 $\alpha$ <sup>-</sup> $\beta$ <sup>-</sup> cells can respond to cells expressing a specific  
142 TCR, we measured IL-2 production after 16 hours of coculture with: parental M12 cells  
143 that are TCR and CD28 negative; M12 cells transduced to express TCR-CD3  
144 complexes; or, M12 cells transduced to express both TCR-CD3 complexes and CD28<sup>27</sup>.  
145 The 2B4 TCR that binds MCC:I-E<sup>k</sup> was expressed on the M12 target cells<sup>28</sup>. No IL-2  
146 was produced in response to the parental M12 cells, IL-2 was produced in response to  
147 TCR<sup>+</sup> M12 cells, and ~2x more IL-2 was produced in response to TCR<sup>+</sup>CD28<sup>+</sup> M12 cells  
148 (**Fig. 1e**). Because M12 cells are a B cell lymphoma line and do not make IL-2, the IL-2  
149 measured in this assay was produced by the 5<sup>M</sup>CAR<sup>+</sup> 58 $\alpha$ <sup>-</sup> $\beta$ <sup>-</sup> cells. These data establish  
150 that our MCC:I-E<sup>k</sup>-based 5<sup>M</sup>CAR system can direct a TCR-specific response.

151 Next we asked if  $5^M$ CARs can redirect CTLs to kill  $CD4^+$  T cells expressing the  
152 5c.c7 TCR, which also recognizes MCC:I-E<sup>k</sup> as an agonist pMHCII<sup>28</sup>.  $CD8^+$  T cells from  
153 B10.A mice were activated *in vitro* and transduced to express the  $5^M$ CAR components.  
154  $5^M$ CAR-CTLs expressing a MCC:I-E<sup>k</sup>-based CRM<sup>pMHCII</sup> were generated to specifically  
155 target 5c.c7  $CD4^+$  T cells, while  $5^M$ CAR-CTLs expressing an Hb:I-E<sup>k</sup>-based CRM<sup>pMHCII</sup>  
156 were generated as negative controls that should not target 5c.c7  $CD4^+$  T cells<sup>15,29</sup>.  
157 Target  $CD4^+$  T cells from 5c.c7 TCR transgenic mice were either cultured alone, or with  
158 the specific and control  $5^M$ CAR-CTLs at varying ratios, to assess killing. The number of  
159 target  $CD4^+$  5c.c7 T cells that remained after 16hrs culture in the absence of  $5^M$ CAR-  
160 CTLs was enumerated by flow cytometry in order to establish a no-killing baseline that  
161 was then used to calculate the percent killing by the  $5^M$ CAR-CTLs. We observed  
162 significantly higher killing of target T cells by the specific  $5^M$ CAR-CTLs when compared  
163 with the control  $5^M$ CAR-CTLs at all effector:target ratios (**Fig. 1f**). No off-target killing  
164 was observed in the control group. These data demonstrate that  $5^M$ CAR-CTLs can kill  
165  $CD4^+$  T cell targets *in vitro* in a CRM<sup>pMHCII</sup>-dependent manner.

166

### 167 **Targeting pathogenic $CD4^+$ T cells with $5^M$ CAR-CTLs *in vitro*.**

168 Having established the basic functionality of our  $5^M$ CAR, we asked if we could use it to  
169 redirect CTLs to kill  $CD4^+$  T cells that are reactive to a self-pMHCII. Here we used  $CD4^+$   
170 T cells expressing the BDC2.5 TCR as targets because: 1)  $CD4^+$  T cells from BDC2.5  
171 TCR transgenic (Tg) mice recognize a self-peptide antigen derived from pancreatic  $\beta$ -  
172 cells presented on the murine MHCII I-A<sup>g7</sup>; and, 2) they can mediate  $\beta$ -cell destruction  
173 and type-1 diabetes (T1D) when transferred into NOD-SCID mice<sup>30,31</sup>. For these



174 experiments, we generated a specific CRM<sup>pMHCII</sup> built with the mimotope peptide RLGL-  
175 WE14 in I-A<sup>g7</sup> that binds the BDC2.5 TCR, and a negative control CRM<sup>pMHCII</sup> built with a  
176 self-peptide from glucose phosphoisomerase (GPI<sub>282-294</sub>) presented in I-A<sup>g7</sup> that is not  
177 associated with T1D<sup>32,33</sup>.

178 CD8<sup>+</sup> T cells from NOD mice were activated *in vitro* and retrovirally transduced to  
179 express the <sup>5M</sup>CARs. Phenotypic analysis showed that the <sup>5M</sup>CAR-CTLs expressed the  
180 CRM<sup>pMHCII</sup>, as detected with anti-I-A<sup>g7</sup> antibodies, and had an increase in CD80 levels  
181 compared with the natural levels of CD80 expression that are induced after activation  
182 (**sFig. 2a**)<sup>34</sup>. The majority of the <sup>5M</sup>CAR-CTLs were CD44<sup>hi</sup> CD62L<sup>-</sup>, Granzyme B<sup>+</sup>,  
183 Perforin<sup>+</sup>, FasL<sup>lo</sup> and Fas<sup>-</sup> (**Fig. S2b-d**), indicating they were primed CTLs with the  
184 potential to kill both by releasing cytotoxic granule proteins and by engaging Fas<sup>35</sup>.

185 To evaluate if these <sup>5M</sup>CAR-CTLs could kill their targets in a TCR-specific manner  
186 we cultured specific (RLGL-WE14:I-A<sup>g7</sup>) and control (GPI:I-A<sup>g7</sup>) <sup>5M</sup>CAR-CTLs with  
187 BDC2.5 CD4<sup>+</sup> T cells at varying ratios of <sup>5M</sup>CAR-CTL:target, and then enumerated the  
188 remaining targets after 16 hours culture. Here again we observed robust killing of the  
189 target CD4<sup>+</sup> T cells by the specific <sup>5M</sup>CAR-CTLs as compared to the control <sup>5M</sup>CAR-  
190 CTLs. In contrast, neither <sup>5M</sup>CAR-CTL population killed polyclonal CD4<sup>+</sup> T cells from a  
191 NOD mouse in an off-target fashion (**Fig. 2a**). These results provide further evidence,  
192 with a second CRM<sup>pMHCII</sup>-TCR recognition model, that <sup>5M</sup>CARs can redirect CTLs to  
193 specifically kill CD4<sup>+</sup> T cells via recognition of the target T cell's clonotypic TCR.

194 Because CTL killing is reported to require less signaling than cytokine production  
195 or proliferation, we next asked if <sup>5M</sup>CAR-CTLs make interferon  $\gamma$  (IFN  $\gamma$ ) or proliferate in  
196 response to target CD4<sup>+</sup> T cells<sup>36</sup>. Accordingly, we used intracellular cytokine staining

197 and flow cytometry analysis to link IFN $\gamma$  production to either the  $5^M$ CAR-CTLs or target T  
198 cells. After culturing specific and control  $5^M$ CAR-CTLs with either BDC2.5 CD4 $^+$  T cells  
199 or polyclonal CD4 $^+$  T cells from NOD mice for 6 hours we found that the specific  $5^M$ CAR-  
200 CTLs produced IFN $\gamma$  only in response to the target BDC2.5 T cells, but not in response  
201 to the polyclonal NOD T cells, while the control  $5^M$ CAR-CTLs produced negligible IFN $\gamma$   
202 upon incubation with either BDC2.5 or NOD T cells (**Fig 2b**). We next tested whether  
203  $5^M$ CAR-CTLs proliferate upon incubation with their targets. CellTrace Violet $^{\text{TM}}$  (CTV)-  
204 labeled  $5^M$ CAR-CTLs were incubated for 3 days with either BDC2.5 or polyclonal NOD  
205 CD4 $^+$  T cells. Proliferating cells that diluted dye were enumerated by flow cytometry.  
206 Specific  $5^M$ CAR-CTLs only proliferated in response to BDC2.5 T cells, while the control  
207  $5^M$ CAR-CTLs did not proliferate when incubated with either BDC2.5 or NOD T cells (**Fig**  
208 **2c**). These data demonstrate that  $5^M$ CAR-CTLs can make cytokines and proliferate in  
209 response to CD4 $^+$  T cell targets expressing the appropriate TCR.

210 To complete our initial evaluation of  $5^M$ CAR performance, we tested the  
211 contribution of the ScoR module to  $5^M$ CAR-CTL function. The ScoR did not enhance  
212 killing of CD4 $^+$  T cell targets (**sFig. 2e**). Because killing is a lower-order function,  
213 requiring few cognate ligands (in this experiment there is a high ligand density of TCRs  
214 on the target cells), we next asked if the ScoR module impacted cytokine production or  
215 proliferation<sup>11,36</sup>. The ScoR did increase the number of specific  $5^M$ CAR-CTLs making  
216 IFN $\gamma$  after 6 hours stimulation (**Fig. 2d**) and the number of specific  $5^M$ CAR-CTLs that  
217 divided after 3-4 days in culture (**Fig. 2e**). These data indicate that the ScoR makes a  
218 significant contribution to responses that might be useful *in vivo*. We therefore moved  
219 forward with the full  $5^M$ CAR system for *in vivo* analysis.

220

221 **<sup>5</sup>M CAR-CTLs kill pathogenic CD4<sup>+</sup> T cells *in vivo*.**

222 We next assessed the ability of specific (RLGL-WE14:I-A<sup>97</sup>) and control (GPI:I-A<sup>97</sup>)  
223 <sup>5</sup>M CAR-CTLs to kill BDC2.5 CD4<sup>+</sup> T cell targets by adapting a standard *in vivo* killing  
224 assay<sup>37</sup>. <sup>5</sup>M CAR-CTLs were transferred into NOD mice. Twelve hours later the recipients  
225 received specific mRaspberry (mRasp)<sup>+</sup> BDC2.5 CD4<sup>+</sup> T cell targets mixed with control  
226 CTV-labeled NOD CD4<sup>+</sup> T cell targets as a reference population. A separate cohort of  
227 NOD mice only received the mixture of targets (no <sup>5</sup>M CAR-CTLs). The spleens were  
228 harvested 5.5 hours after target transfer and analyzed by flow cytometry (**sFig. 3**).  
229 Killing was evaluated by measuring changes in the frequency of specific targets relative  
230 to the reference targets (**Fig. 3**). The mice that did not receive <sup>5</sup>M CAR-CTLs, and those  
231 that received control <sup>5</sup>M CAR-CTLs had a mean ratio of 0.48 and 0.55 BDC2.5 to NOD  
232 CD4<sup>+</sup> T cell targets, respectively, while those receiving specific <sup>5</sup>M CAR-CTLs had a  
233 mean ratio of ~0.27, indicating ~50% killing of the target BDC2.5 CD4<sup>+</sup> T cells relative to  
234 the control NOD CD4<sup>+</sup> T cells (**Fig. 3**). These data show that <sup>5</sup>M CAR-CTLs can rapidly  
235 find and eliminate their targets *in vivo*.

236

237 **<sup>5</sup>M CAR-CTLs prevent autoimmune diabetes in NOD-SCID mice**

238 The ability of <sup>5</sup>M CAR-CTLs to kill autoimmune CD4<sup>+</sup> T cells *in vivo* led us to ask if they  
239 could prevent BDC2.5 CD4<sup>+</sup> T cell-mediated  $\beta$ -cell destruction and diabetes. For these  
240 experiments, we used a model in which we transferred BDC2.5 CD4<sup>+</sup> T cells into NOD-  
241 SCID mice to induce diabetes<sup>31</sup>. In this model we have observed lymphocytic infiltration  
242 of the pancreas 5 days after BDC2.5 T cell transfer, which progresses to severe insulinitis

243 of most islets by day 6-8, deterioration of islet integrity, and diabetes onset between  
244 days 9-14 (**sFig. 4a,b**).

245 To explore if  $5^M$ CAR-CTLs can prevent diabetes we transferred BDC2.5 CD4<sup>+</sup> T  
246 cells into NOD-SCID mice on day 0 (**Fig. 4a**). On day 1 the mice were divided into three  
247 cohorts: BDC2.5-only (untreated), control  $5^M$ CAR-CTL-treated, and specific  $5^M$ CAR-CTL-  
248 treated. Urine glucose was then measured daily to monitor diabetes onset and  
249 progression. All untreated and control  $5^M$ CAR-CTL-treated mice developed diabetes  
250 within 10 days, while all mice treated with specific  $5^M$ CAR-CTLs remained diabetes free  
251 for the duration of the 3-week experiment (**Fig. 4b**). Histological sections of the  
252 pancreases of the untreated and control  $5^M$ CAR-CTL-treated diabetic mice showed  
253 widespread lymphocytic infiltration and islet destruction, while pancreases from mice  
254 treated with specific  $5^M$ CAR-CTLs appeared free of infiltration (**Fig. 4c**). Disease  
255 amelioration corresponded with nearly complete elimination of BDC2.5 CD4<sup>+</sup> T cells in  
256 the spleens of the specific  $5^M$ CAR-CTL-treated mice, as evaluated by flow cytometry  
257 (**Fig. 4d,e**). Importantly, the  $5^M$ CAR-CTLs were present in the spleens of the recipient  
258 mice 21 days after transfer, indicating that specific  $5^M$ CAR-CTLs have the potential for  
259 long-term engraftment (**Fig. 4d,e**).

260

### 261 **$5^M$ CAR-CTLs halt ongoing insulinitis**

262 Having established that BDC2.5-specific  $5^M$ CAR-CTLs can eliminate their targets and  
263 prevent diabetes in NOD-SCID mice when transferred one day after BDC2.5 CD4<sup>+</sup> T  
264 cells, we asked if these  $5^M$ CAR-CTLs could reverse insulinitis and prevent diabetes if  
265 transferred at a later stage in disease progression. Specifically, we asked whether

266 <sup>5M</sup>CAR-CTLs could prevent diabetes on day 7 after BDC2.5 transfer, at which point  
267 islets are invaded by lymphocytic infiltrates and they have substantially lost their  
268 structural integrity (**Fig. 5a, sFig 4a**).

269 BDC2.5 T cells were transferred into NOD-SCID mice on day 0 and the  
270 recipients were divided into three cohorts on day 7: BDC2.5-only (untreated), control  
271 <sup>5M</sup>CAR-CTL-treated, and specific <sup>5M</sup>CAR-CTL-treated. All untreated and control <sup>5M</sup>CAR-  
272 CTL-treated mice developed diabetes by day 13, while 8 of 9 specific <sup>5M</sup>CAR-CTL-  
273 treated mice remained diabetes free (**Fig. 5b**). Those protected from diabetes  
274 maintained normal weight and blood glucose throughout the experiment (**sFig 5a,b**).  
275 Furthermore, histological sections from the pancreases of specific <sup>5M</sup>CAR-CTL-treated  
276 mice showed a lack of insulitis, whereas the structural integrity of the islets was  
277 destroyed in the untreated and control <sup>5M</sup>CAR-CTL-treated mice (**Fig 5c**). Importantly, at  
278 the experimental endpoints (day 11-13 for mice with diabetes and day 36 for diabetes  
279 free mice) analysis of the spleens and pancreatic lymph nodes (pLN) indicated that the  
280 BDC2.5 CD4<sup>+</sup> T cells had been eliminated (**Fig. 5d,e and sFig. 5c**). Even in the one  
281 specific <sup>5M</sup>CAR-CTL-treated animal that had become diabetic, the BDC2.5 CD4<sup>+</sup> T cells  
282 had been nearly eliminated by day 11; although apparently this was too late for diabetes  
283 protection in this recipient (**sFig. 5c**). <sup>5M</sup>CAR-CTLs also remained in the spleens and  
284 pLN of recipient mice for the duration of the experiment (**Fig. 5e, sFig. 5c**), again  
285 demonstrating that they can engraft for several weeks.

286

287 **<sup>5M</sup>CAR-CTLs home to and persist in the pancreas**

288 Having determined that specific <sup>5M</sup>CAR-CTLs can reverse insulinitis and prevent diabetes,  
289 while control <sup>5M</sup>CAR-CTLs cannot, we evaluated where the <sup>5M</sup>CAR-CTLs traffic, where  
290 they encounter their targets, and how the numbers of both the targets and <sup>5M</sup>CAR-CTLs  
291 change over time. Here again NOD-SCID mice received BDC2.5 CD4<sup>+</sup> T cells on day 0  
292 and <sup>5M</sup>CAR-CTLs on day 7. Cohorts of mice were euthanized on day 7 (pre-<sup>5M</sup>CAR-CTL  
293 transfer), 8, 10, 15, and 36 to enumerate BDC2.5 CD4<sup>+</sup> T cells and <sup>5M</sup>CAR-CTLs within  
294 the spleens, pLNs, and pancreases.

295 In mice treated with control <sup>5M</sup>CAR-CTLs, the number of BDC2.5 CD4<sup>+</sup> T cells in  
296 the spleens and pLN remained relatively constant from day 7-10, but increased from  
297 day 10 to 15 during the time in which the mice developed diabetes (**Fig. 6a and sFig.**  
298 **6**). In the pancreas, BDC2.5 CD4<sup>+</sup> T cells increased in numbers by day 10 and, by day  
299 15, had expanded ~100-fold compared to day 7 (**Fig. 6b**).

300 In mice treated with specific <sup>5M</sup>CAR-CTLs, a reduction in the frequency and  
301 number of BDC2.5 CD4<sup>+</sup> T cells was evident by day 10 in the pLNs, in the spleens by  
302 day 15, and as early as day 8 in the pancreases. Importantly, BDC2.5 CD4<sup>+</sup> T cells  
303 were barely detectable by day 15 in any of the analyzed tissues, and none were  
304 detected by the experimental endpoint at day 36.

305 Regarding the <sup>5M</sup>CAR-CTLs, both the control and specific populations were  
306 detected in the spleen and the pLN on day 8 (**Fig. 6a and sFig. 6**). Importantly, both  
307 populations also homed to the inflamed pancreases within the first 24 hours post-  
308 transfer (day 8)(**Fig. 6b**). The numbers of control <sup>5M</sup>CAR-CTLs stayed relatively  
309 constant in the spleens from days 8 to 15, increased slightly over time in the pLNs, and  
310 actually peaked at day 10 in the pancreas while the number of specific <sup>5M</sup>CAR-CTLs

311 remained relatively constant in the spleens, pLNs, and pancreases from day 8 to 15. Of  
312 note, the number of specific <sup>5M</sup>CAR-CTLs was significantly lower than the control  
313 <sup>5M</sup>CAR-CTLs at day 10 and 15 in the pancreases, mirroring the loss of BDC2.5 cells.  
314 Finally, the specific <sup>5M</sup>CAR-CTLs were present in the spleens, pLNs, and pancreases at  
315 the termination of the experiment on day 36.

316 Overall, these results indicate that <sup>5M</sup>CAR-CTLs can rapidly home to inflamed  
317 pancreases, as well as to lymphoid tissues, and can eliminate their target cells from  
318 those tissues in a TCR-specific fashion. Furthermore, they can persist in these tissues  
319 for weeks, offering the potential for long-term tissue-resident protection.

320

### 321 **A panel of <sup>5M</sup>CAR-CTLs can prevent autoimmune diabetes in NOD mice**

322 Once we established that <sup>5M</sup>CAR-CTLs can prevent T1D induction by a monoclonal  
323 population of pathogenic CD4<sup>+</sup> T cells in NOD-SCID mice, we wanted to test the  
324 efficacy of <sup>5M</sup>CAR-CTL treatment in the NOD mouse model of spontaneous T1D. In this  
325 model insulinitis can be detected by 10 weeks of age in most mice, while diabetes onset  
326 typically occurs at 12-14 weeks of age<sup>38,39</sup>. There is a sexual dimorphism regarding the  
327 frequency of disease incidence, with 80% or more of female mice becoming diabetic by  
328 45 weeks<sup>38,40</sup>. Also, in NOD mice as in humans, T1D is thought to be initiated by T cells  
329 reactive to one or a small number of self-pMHC<sup>41,42</sup>. For example, mice that lack a key  
330 amino acid in an insulin peptide (INSB<sub>9-23</sub>) presented by I-A<sup>g7</sup> are protected from  
331 diabetes development, suggesting that this peptide is critical to disease initiation<sup>42</sup>. In  
332 addition, CD4<sup>+</sup> T cells specific for newly discovered hybrid insulin peptides (HIP)  
333 presented by I-A<sup>g7</sup>, including the BDC2.5 T cells used here, can induce diabetes in

334 adoptive transfer models<sup>43</sup>. We therefore generated three additional CRM<sup>pMHCII</sup>,  
335 presenting either the insulin peptide (INSB<sub>9-23</sub>) or two hybrid insulin peptides (HIP2.5,  
336 HIP6.9) in I-A<sup>g7</sup>, to test if a mixture of <sup>5M</sup>CAR-CTLs could prevent diabetes in NOD mice.  
337 Of note, the HIP2.5:I-A<sup>g7</sup>- and RLGL-WE14:I-A<sup>g7</sup>-based CRM<sup>pMHCII</sup> used above are likely  
338 to target partially overlapping cohorts of autoimmune CD4<sup>+</sup> T cells<sup>44</sup>.

339 To determine if <sup>5M</sup>CAR-CTLs that target CD4<sup>+</sup> T cells specific to these self-  
340 pMHCII can establish long-term engraftment and protect against autoimmune diabetes,  
341 we transferred a mixture of specific (INSB:I-A<sup>g7</sup>, HIP2.5:I-A<sup>g7</sup>, HIP6.9:I-A<sup>g7</sup> and RLGL-  
342 WE14:I-A<sup>g7</sup>) or control (GPI:I-A<sup>g7</sup>) <sup>5M</sup>CAR-CTLs into neonatal male and female NOD  
343 mice. We chose neonatal mice as recipients because: 1) disease-initiating autoimmune  
344 CD4<sup>+</sup> T cells are thought to emerge from the thymus soon after birth; 2) physiological  $\beta$ -  
345 cell death at 2 weeks of age is reported to trigger priming of self-reactive T cells; and, 3)  
346 we wanted to eliminate the target CD4<sup>+</sup> T cells before they could provide help to  
347 autoimmune CD8<sup>+</sup> T cells<sup>45,46</sup>. A third group of newborn mice was left untreated to  
348 establish a baseline for comparison of T1D incidence.

349 We first asked if <sup>5M</sup>CAR-CTLs would persist throughout the critical period of early  
350 autoimmune T cell development, early insulinitis, and  $\beta$  cell apoptosis. To address this  
351 question, we sacrificed a cohort of male mice at 13 weeks of age to assess <sup>5M</sup>CAR-CTL  
352 engraftment. <sup>5M</sup>CAR-CTLs were detected in both the control and specific groups of mice  
353 (**Fig. 7a**). These data verified that the <sup>5M</sup>CAR-CTLs can engraft long-term in NOD mice  
354 and were thus present during the period of life that is thought to be critical for  
355 spontaneous T1D in these animals.



356 Due to the sexual dimorphism of T1D in NOD mice, females were followed for  
357 315 days to assess diabetes development. Diabetes onset and progression for those  
358 treated with control <sup>5M</sup>CAR-CTLs mirrored that of the untreated group in the Kaplan-  
359 Meier plots (**Fig. 7b**). At day 315, 14 of 16 untreated mice had developed diabetes and  
360 13 of 16 control <sup>5M</sup>CAR-CTL-treated mice had developed diabetes. In contrast, fewer  
361 mice treated with the specific <sup>5M</sup>CAR-CTLs developed diabetes (7 of 16) when  
362 compared to the untreated animals or those that were treated with control <sup>5M</sup>CAR-  
363 CTLs. These data demonstrate that a mixture of <sup>5M</sup>CAR-CTLs targeting autoimmune  
364 CD4<sup>+</sup> T cells with a limited specificity can significantly reduce the incidence of T1D in  
365 NOD mice.

366 We also analyzed the data using the Cox proportional hazards model. Risk of  
367 diabetes incidence in mice with the specific <sup>5M</sup>CAR-CTLs were approximately 3 times  
368 lower when compared with the untreated and control mice. Hazard ratios (HRs) and the  
369 respective confidence intervals (CI) for the specific group in comparison to the untreated  
370 group were HR (95% CI): 0.33 (0.13, 0.82); p value=0.017; and the specific group in  
371 comparison to the control group were HR (95% CI): 0.36 (0.14, 0.91); p value=0.030.  
372 Finally, there were no differences in the diabetes incidence between the control and  
373 untreated groups HR (95% CI): 0.91 (0.43, 1.94); p value = 0.808.

374 Finally, a cohort of surviving mice (4 males and 5 females) were euthanized after  
375 day 315 for analysis of pooled spleens and lymph nodes. We detected <sup>5M</sup>CAR-CTLs in  
376 2 out of 9 mice (**sFig. 7a**). To explore if additional <sup>5M</sup>CAR-CTLs might be present below  
377 the limit of detection we transferred BDC2.5 CD4<sup>+</sup> T cells into the remaining diabetes-  
378 free mice to potentially expand out the BDC2.5-specific <sup>5M</sup>CAR-CTLs. In these boosted

379 mice, 2 of 4 specific <sup>5M</sup>CAR-CTL recipient mice had detectable specific <sup>5M</sup>CAR-CTLs  
380 (**sFig. 7b**). We cannot know if the <sup>5M</sup>CAR-CTLs in the specific group expanded in  
381 response to the BDC2.5 T cells, or would have been detectable without them.  
382 Nevertheless, the data indicate that <sup>5M</sup>CAR-CTLs engraft up to a year or longer in a  
383 subset of animals despite the CD8<sup>+</sup> T cell attrition that normally occurs with aging<sup>47</sup>.

384

## 385 **Discussion**

386 The goals of this study were to evaluate the function of our 1<sup>st</sup> generation biomimetic  
387 <sup>5M</sup>CAR *in vitro* and *in vivo*. We show that <sup>5M</sup>CARs can redirect CTL specificity against  
388 clonotypic TCRs expressed by CD4<sup>+</sup> T cells and can co-opt CTL functions, including  
389 IFN $\gamma$  production, proliferation, and killing, in a TCR-specific manner *in vivo*. We also  
390 demonstrate that <sup>5M</sup>CAR-CTLs can rapidly eliminate pathogenic CD4<sup>+</sup> T cells, and thus  
391 neutralize their detrimental impact, in mouse models of T1D. The <sup>5M</sup>CAR design,  
392 biological implications of the data, and potential applications of this technology are  
393 discussed below along with some thoughts on the future of the technology.

394 Our biomimetic <sup>5M</sup>CAR design integrates three key operating principles not found  
395 together in other CARs. First, the receptor modules assemble with the CD3 signaling  
396 modules into complexes that possess a full complement of 10 ITAMs, as well as other  
397 key motifs described elsewhere, that are thought to either mediate or regulate signaling  
398 through the TCR-CD3 complex<sup>12,21,48-52</sup>. This feature was incorporated into the design  
399 because the multiplicity of ITAMs that get phosphorylated during signaling via the TCR,  
400 or even <sup>1M</sup>CARs, influences subsequent T cell function; furthermore, we speculate that  
401 preserving access to the natural signaling apparatus may serve as an important safety

402 feature to prevent dysregulated responses, as improper signaling can lead to  
403 dysregulated T cell function<sup>21,53-55</sup>. We note that a recently reported 4-module TruC CAR  
404 also takes advantage of the native CD3 signaling modules<sup>56</sup>. For the second key design  
405 principle we maintained the natural biophysical properties of receptor:ligand interactions  
406 that have evolved to mediate T cell activation. T cells are normally selected and  
407 activated within a narrow kinetic window of TCR-pMHC interactions, while higher than  
408 normal affinity leads to attenuated or even undesired effects; therefore, tuning the  
409 affinity of a CAR for its ligand to this natural range, while maintaining specificity, is an  
410 important consideration for optimizing function<sup>19,57-60</sup>. Of note, a 4-module approach was  
411 previously described whereby the variable regions of the anti-TNP SP6 antibody were  
412 used to make a chimeric TCR (cTCR) that associated with the CD3 signaling modules,  
413 and redirected CTL specificity and function *in vitro*<sup>61</sup>. In that report the SP6:TNP  
414 interaction that was used was of very low affinity<sup>62</sup>, and thus more akin to TCR:pMHCII  
415 interactions ( $\mu\text{M}$ ) than typical antibody:antigen interactions (nM), suggesting affinity  
416 optimized receptor modules based on antibodies might be effective in a next generation  
417 <sup>5M</sup>CAR approach. Finally, our biomimetic design is unique from other CAR designs in  
418 that it includes a surrogate coreceptor module. CD4 and CD8 sequester Lck away from  
419 the CD3 ITAMs in the absence of cognate pMHC, meaning that they should naturally  
420 keep Lck away from ITAMs associated with CARs of any design and thus prevent  
421 optimal CAR signaling<sup>17</sup>. Our ScoR provides the opportunity for Lck to be positioned  
422 proximally to the CRM<sup>pMHCII</sup>-CD3 ITAMs within the immunological synapse between a  
423 <sup>5M</sup>CAR-CTL and a CD28<sup>+</sup> or CTLA-4<sup>+</sup> target T cell. An appealing conceptual aspect of  
424 using a ScoR is that alternate designs could be used to enhance targeting if needed.

425 For example, ScoRs could be built with the ectodomains of other molecules that localize  
426 to the center of the immunological synapse (e.g. PD-L1 or CD70) to target the subset of  
427 CD8<sup>+</sup> CD28<sup>-</sup> T<sub>H</sub>1 cells that accumulate in humans with aging<sup>63</sup>. Altogether, the data  
428 presented here demonstrate that the three operating principles discussed above can be  
429 successfully integrated into a functional 5<sup>M</sup>CAR system.

430 While the current study focused on engineering and testing our 5<sup>M</sup>CARs, we also  
431 made some noteworthy observations that speak to the usefulness of 5<sup>M</sup>CAR-CTLs as  
432 tools for studying the role of particular T cell populations in biology. For example, we  
433 show that 5<sup>M</sup>CAR-CTLs can rapidly home to the site of inflammation, eliminate their  
434 target population in a TCR-specific manner, and persist for months in mice. We also  
435 show that treating neonatal NOD mice with a mixture of 5<sup>M</sup>CAR-CTLs that target a  
436 limited number of known pMHCII-specific autoimmune CD4<sup>+</sup> T cells can significantly  
437 decrease diabetes incidence, consistent with the idea that one or a limited number self-  
438 pMHCII reactivities initiate disease. Together, these data indicate that 5<sup>M</sup>CAR-CTLs can  
439 be used to eliminate specific T cell populations in mice and then study how particular  
440 immune responses are initiated and proceed in their absence.

441 In addition to their potential research applications, one benefit of using mouse  
442 models of T1D as testing grounds for evaluating 5<sup>M</sup>CAR-CTL function is that our results  
443 point to therapeutic applications for treating diseases mediated by pathogenic T cells.  
444 For example, we show that 5<sup>M</sup>CAR-CTLs can reverse ongoing insulinitis and dramatically  
445 decrease T1D disease incidence in NOD mice. A prior 1<sup>M</sup>CAR study showed that  
446 targeting a single pathogenic CD8<sup>+</sup> T cell population can also decrease diabetes  
447 incidence in NOD mice<sup>64</sup>; therefore, targeting a mixture of CD4<sup>+</sup> and CD8<sup>+</sup> T cell

448 clonotypes with <sup>5M</sup>CAR-CTLs in patients with preclinical disease (e.g. two  
449 autoantibodies), who are likely to develop diabetes, may be effective as a preventative  
450 therapy<sup>65</sup>. Multiple sclerosis (MS) is another autoimmune disease involving pathogenic  
451 CD4<sup>+</sup> T cells for which dominant MHCII associations exist and a number of self-peptide  
452 auto-antigens have been described<sup>66</sup>. Importantly, MS cannot be managed as readily as  
453 diabetes, the methods for management are immunosuppressive, and <sup>1M</sup>CARs have  
454 shown efficacy in experimental autoimmune encephalitis (EAE), a mouse model of  
455 MS<sup>67</sup>. Given the success of <sup>1M</sup>CAR-T cell therapy in treating hematologic malignancies,  
456 another prime target for <sup>5M</sup>CAR-CTL therapy would be TCR<sup>+</sup> leukemias and lymphomas  
457 of the T cell lineage (e.g. T-ALL and CTCL) which are typically clonal and thus would  
458 not require targeting multiple specificities<sup>68,69</sup>. Significant advances have been made in  
459 identifying pMHC that specifically interact with a TCR<sup>70,71</sup>. Using such methods to  
460 identify a pMHC that binds a T lymphoma-derived TCR would enable the rapid  
461 generation of <sup>5M</sup>CAR-CTLs to target TCR<sup>+</sup> tumors. Finally, <sup>5M</sup>CAR-CTLs could  
462 potentially be used to protect transplanted tissue if the appropriate pathogenic T cell  
463 clonotypes that mediate rejection can be eliminated prior to transplant<sup>72</sup>. Importantly, the  
464 lack of weight loss or overt signs of distress by the mice used in our studies suggest  
465 that the <sup>5M</sup>CAR-CTLs themselves are not pathogenic. In addition, the conservation of  
466 pMHC and TCR structures between mice and humans suggest that humanized <sup>5M</sup>CARs  
467 should function similarly.

468           Moving forward, a multi-pronged approach is required to advance biomimetic  
469 <sup>5M</sup>CAR designs. Directly comparing their performance with other CAR designs, as well  
470 as their natural counterparts, will provide benchmarks for the iterative process of

471 refinement to enhance their function according to the roadmap that has advanced  
472 <sup>1M</sup>CARs<sup>7-9</sup>. Additional basic research into the molecular machinery that naturally drives  
473 T cell activation is also of fundamental importance, as it will provide a more complete  
474 blueprint for the development of future generations of biomimetic designs. These lines  
475 of investigation will provide us with the information needed to refine our 1<sup>st</sup> generation  
476 biomimetic <sup>5M</sup>CARs, optimize their application, and design future generations of <sup>5M</sup>CAR  
477 modules that are tailored to target specific cell populations.

478

## 479 **Methods**

480

### 481 **<sup>5M</sup>CAR construction**

482 <sup>5M</sup>CAR constructs were generated by standard molecular biology techniques. The  
483 genes encoding the CRM<sup>PMHClI</sup> and ScoR were cloned into pUC18 (Fermentas),  
484 sequenced (ELIM BIOPHARM), and then subcloned into an MSCV-based retroviral  
485 expression vector.

486

487 The following sequence for the chimeric CD80-Lck surrogate coreceptor (ScoR) was  
488 subcloned into the “pP2” puromycin-resistance MSCV vector (MCS-IRES-Puro  
489 resistance<sup>73</sup>) via 5’XhoI and 3’EcoRI:

```
490         acgtctagatacctcgaggccacatggcttgcaattgtcagttgatgcaggatacaccactcctcaagttccat
491 gtccaaggctcattcttctcttggctgctgattcgtcttcacaagtgcttcagatgttgatgaacaactgtccaagtcagtga
492 aagataaggattgtgctgcttgccgttacaactctcctcatgaagatgagctgaagaccgaatctactggcaaaaacatg
493 acaaagtggctgctgctgtcattgctgggaaactaaaagtgtggcccgagtataagaaccggactttatatgacaacacta
494 cctactcttatcatcctgggctggtccttcagaccggggcacatacagctgtgtcgttcaaaagaaggaaaggaa
495 cgtatgaagtaaacacttggctttagtaaagttgtccatcaaagctgacttcttaccaccaataactgagcttggaac
496 ccatctgcagacactaaaaggattacctgcttgctccgggggttcccaaagcctcgcttctcttggttgaaaatggaag
497 agaattacctggcatcaatacgacaattcccaggatcctgaatctgaattgtacaccattagtagccaactagattcaata
```

498 cgactcgcaaccacaccattaagtgtctattaatatggagatgctcacgtgtcagaggacttcacctgggaaaaacc  
499 ccagaagacctctgatagcaagaacacacttgtgctcttggggcaggattcggcgagtaataacagtcgtcgtcatc  
500 gttgtcatcaaatgcttctgtaagcacagaagctgttcagaagaaatgaggcaagcagagaacaacaacagcc  
501 ttacctcgggctgaagaagcattagctgaacagaccgtcttcttaccactagtcactatcccatagtcccactggacag  
502 caagatctcgtgcccatccggaatggctctgaagtgcgggaccactgggtcacctatgagggatctctcccaccagcat  
503 ccccgtgcaagacaacctgggtatcgccctgcacagttatgagccctccatgatggagactgggcttgagaagggtg  
504 aacagctccgaatcctggagcagagcggtagtggtggaaggctcagtcctgacgactggccaagaaggcttattcc  
505 cttcaactcgtggcgaaagcaaacagcctggagcctgaacctgttctcaagaatctgagccgtaaggacgccgagc  
506 ggcagctttggcgcccgggaacacgcatggatccttctgatccgggaaagcgaagcactgcggggctctttccctgt  
507 cggtcagagacttcgaccagaaccagggagaagtggtagaacattacaagatccgtaacctagacaacggtagcttct  
508 acatctcccctcgtatcactttccggattgcacgatctagtcgccattacaccaacgcctctgatgggctgtgcacaaagt  
509 tgagccgtccttgccagaccagaagcccagaaacctatgggtgggaggacgaatgggaagtcccagggaacactg  
510 aagttggtggagcggctgggagctggccagttcggggaagtgtggatgggtactacaacggacacacgaagggtggc  
511 ggtgaagagtctgaacaaggagcattgccccgcagccttctggctgaggtaacctcatgaagcagctgcagca  
512 cccgcggctagtccggctttagcagtggtcaccaggaacctatcatcatcacggaatacatggagaacgggagc  
513 ctagtatgttctcaagactccctcgggcatcaagttgaatgtcaacaaactttggacatggcagcccagattgcagagg  
514 gcatggcgttcatcgaagaacagaattacatccatcgggacctgcgcgcccaacatcctggtgtctgacacgctgagc  
515 tgcaagattgcagactttggcctggcgcgctcattgaggacaatgagtacacggccccgggagggggccaaatttccat  
516 taagtggacagcaccagaagccattaactatgggacctcaccatcaagtcagacgtgtggtcctcgggatcttgcttaca  
517 gagatcgtcaccacggctgaatccctaccaggaatgaccaacctgaagtcattcagaacctggagagaggctacc  
518 gcatggtgagacctgacaactgtccggaagagctgtaccacctcatgatgctgtgctggaaggagcggccagaggacc  
519 ggcccacgcttgactacctcggagtggtctggatgacttctcacagccacagagggccagtaccagcccagcctggta  
520 cctagtgagaattctacatg  
521

522 The following sequence for the I-E<sup>k</sup> $\alpha$ .TCR $\alpha$  chimeric CRM<sup>pMHCII $\alpha$</sup>  subunit was subcloned  
523 into the “pZ4” zeocin-resistance MSCV vector (MCS-IRES-Zeo<sup>73</sup>) via 5’XhoI and  
524 3’BamHI:

525 aataagcttctcgagcggccaccatggccacaattggagccctgctgtaagattttcttattgctgttctgatgagctc  
526 ccagaagtcattgggctatcaagaggaacacaccatcatccaggcggagttctatctttaccagacaaacgtggagagt  
527 ttatgtttgactttgacggcgtatgagattttccatgtagacattgaaaagtcagagaccatctggagactgaagaatttcaa  
528 agtttgccagctttgaggctcaggggtcactggctaatatagctgtggacaaagctaacctggatgcatgaaagagcgttc  
529 caacaacactccagatccaacgtggccccagaggtgactgtactctcagaagccctgtgaacctgggagagcccaa  
530 catctcatctgtttcattgacaagttctcccctccagtggtcaatgtcacctggttccggaatggacggcctgtcaccgaagg  
531 cgtgtcagagacagtgtttctcccagggacgatcacctctccgcaattccactatctgacctctgccctccacagatg  
532 atttctatgactgtgaggtggatcactggggttgaggagcctctgcggaagcactgggagttgaaagagaaaacctcct  
533 cccagaaactaaagagtgtgatccacggtgaccgagaaaagccttgaaacagatatgaacctaaactttcaaacctgt  
534 cagttatgggactccgaatcctcctgctgaaagtagcgggatttaacctgctcatgacgctgaggctgtggtccagttgagg  
535 atccgcta  
536

537 The MCC:I-E<sup>k</sup>β.TCRβ chimeric CRM<sup>pMHCIIβ</sup> subunit was subcloned into the “pP2-  
538 mEGFP” puromycin-resistance MSCV vector via 5’XhoI and 3’NotI. This resulted in the  
539 CRM<sup>pMHCIIβ</sup> subunit being cloned in frame with a (GGGS)<sub>3</sub> linker and mEGFP as  
540 previously reported for TCRβ. For the sequence below, the underlined nucleotides flank  
541 the MCC peptide-encoding sequence:

542       aatctcgagcgccacccatggtgtggctccccagagttccctgtgtggcagctgtgatcctgttgctgacagtgtgag  
543 ccctccagtggttggctcagagactccgatccgccaacgagagggccgacctgatcgctacctgaagcaggccacc  
544 aaggaattcagatccggaggcggaggctccctggtgcctcggggctccggaggcggaggctccgtcgacagaccatg  
545 gttttggaatactgtaaatctgagtgtcatttctacaacgggacgcagcgcgtgcggcttctggaagatacttctacaacct  
546 ggaggagaacctgcgcttcgacagcgacgtggcgagttccgcgcggtgaccgagctggggcggccagacgcccag  
547 aactggaacagccagccgagttcctggagcaaaagcgggcccggaggtggacacggtgtgcagacacaactatgaga  
548 tcttcgataacttctgtgcccggagagttgagcctacggtgactgtgtaccccacaagacgcagcccctggaacacc  
549 acaacctcctggtctgctctgtgagtgtacttctaccctggcaacattgaagtcagatggttccggaatggcaaggaggaga  
550 aaacaggaattgtgtccacgggcctggtccgaaatggagactggacctccagacactggtgatgctggagacggttct  
551 cagagtggagaggttacacctgccaggtggagcatcccagcctgaccgacctgtcacggtcgagtggaaagcacag  
552 tccacatctgcacagaacaagtgtggaatcactagtgcacatcctatcatcagggggttctgtctgcaaccatcctctatgagat  
553 cctactggggaaggccaccctatatgctgtgctggtcagtgccctagtgtgatggccatggtcaagaaaaaaaaattccgc  
554 ggccgatgatgagatctgagctccatagaggcg  
555

556 The Hb:I-E<sup>k</sup>β.TCRβ chimeric CRM<sup>pMHCIIβ</sup> subunit was generated identically to that  
557 described above for the MCC:I-E<sup>k</sup>β.TCRβ chimeric CRM<sup>pMHCIIβ</sup> subunit. The nucleotides  
558 that follow encode the Hb peptide as well as the underlined nucleotides that flank the  
559 peptide-encoding sequence:

560       ggatccggcaagaaggtgatcaccgcctcaacgagggcctgaaggaattc

561  
562 The following sequence for the I-A<sup>d</sup>α.TCRα chimeric CRM<sup>pMHCIIα</sup> subunit was subcloned  
563 into the pMSCV-ires-CFP II (gift from Dario Vignali, Addgene plasmid # 52109) via  
564 5’EcoRI and 3’XhoI:

565       gaattccgccaccatgccgtgcagcagagctctgattctgggggtcctgcacctgaacaccatgctcagcctctgc  
566 ggaggtgaagacgacattgaggccgaccacgtaggcttctatggtacaactgtttatcagctcctggagacattggccag  
567 tacacacatgaatttgatggtgatgagttgttctatgtggactggataagaagaaaactgtctggaggctcctgagttggc



568 caattgatactctttgagccccaaggtggactgcaaaacatagctgcagaaaaacacaacttgggaatcttgactaagag  
569 gtcaaatttcaccccagctaccaatgaggctcctcaagcgactgtgttcccaagtcccctgtgctgctgggtcagcccaac  
570 acccttatctgctttgtggacaacatctcccacctgtgatcaacatcacatggctcagaaatagcaagtcagtcacagacg  
571 gcgtttatgagaccagcttctctgtcaaccgtgaccattcctccacaagctgtcttatctcaccttcatcccttctgatgatgac  
572 atttatgactgcaaggtggagcactggggcctggaggagccggttctgaaacactgggaacctgagattccagccccat  
573 gtcagagctgacagaaactgtgtgtgatgccacgttgaccgagaaaagctttgaaacagatatgaacctaaacttcaaa  
574 acctgtcagttatgggactccgaatcctcctgctgaaagtagcgggatttaacctgctcatgacgctgaggctgtggtccagt  
575 tgactcgag  
576

577 The RLGL-WE14:I-A<sup>97</sup>β.TCRβ chimeric CRM<sup>pMHCIIβ</sup> subunit was subcloned into the  
578 “pP2-mEGFP” puromycin-resistance vector via 5’XhoI and 3’NotI. This resulted in the  
579 CRM<sup>pMHCIIβ</sup> subunit being cloned in frame with a (GGGS)x3 linker and mEGFP as  
580 previously reported for TCRβ. For the sequence below, the underlined nucleotides flank  
581 the RLGL-WE14 peptide-encoding sequence:

582 cacgcaagcttctcgagcgccaccatggctctgcagatccccagcctcctcctcctcggtgctgtggtggtgctgat  
583 ggtgctgagcagcccaggactgagggcggagactccgcgatccccgcttgggctgtggagtaggatggaccaatta  
584 gccaaggaattgactgaggaggtgagcggaggtggcgggtcactagtccccgaggaagtggaggtggagggctctcc  
585 agggactgagggcggagactccgaaaggcatttcgtgcaccagttcaagggcgagtgtacttccaacgggacgca  
586 ggcatacggctcgtgaccagatacatctacaaccgggaggagtacctgcgcttcgacagcgacgtgggagtgatccg  
587 cgcggtgaccgagctggggcggcactcagccgagtactacaataagcagtagctgagcgaacgaggccgagctg  
588 gacacggcgtgcagacacaactacgaggagacggaggtccccacctcctgaggcggctgaacagcccaatgtcgc  
589 catctccctgtccaggacagaggccctcaaccaccacaacactctggtctgttcggtgacagatttaccagccaagat  
590 caaagtgcgctggttcaggaatggccaggagagacagtgggggtctatccacacagcttattaggaatggggactgg  
591 acctccaggtcctggtcatgctggagatgaccctcatcaggagaggtctacacctgcatgtggagcatcccagcctg  
592 aagagccccatcactgtggagtgaggggcacagtccgagctgcccggagctgtggaatcactagtcacatcatca  
593 gggggtctgtctgcaaccatcctctatgagatcctactgggaaggccaccctatatgctgtgctggtcagtgccctagtgc  
594 tgatggccatggtcaagaaaaaaaaattccgcgccgcatga  
595

596 The genes encoding the GPI:I-A<sup>97</sup>β.TCRβ, InsB9-23:I-A<sup>97</sup>β.TCRβ, HIP2.5:I-A<sup>97</sup>β.TCRβ,  
597 and HIP6.9:I-A<sup>97</sup>β.TCRβ chimeric CRM<sup>pMHCIIβ</sup> subunits were generated identically to that  
598 described above for the RLGL-WE14:I-A<sup>97</sup>β.TCRβ chimeric CRM<sup>pMHCIIβ</sup> subunit. The  
599 nucleotide sequences that follow encode the distinct peptides. The underlined  
600 nucleotides flank the peptide-encoding sequence:

601

602 GPI: gcggatcccttatctattgcgcttcacgtgggcttcgatcactttgaagtcgac

603 INSB 9-23: gcggatccctcacatctagttgaagcgctatatctagttgaggagaaagaggcgtcgac

604 HIP2.5: gcggatcccggcgacctgcagactctggccctgtggagcaggatggacgtcgac

605 HIP6.9: gcggatcccggcgacctgcagactctggccctgaacgccgcccagggacgtcgac

606

## 607 **Retroviral production**

608 Retroviruses used for transduction of  $58\alpha^{-}\beta^{-}$  cells, M12 cells, and B10.A-derived CTLs  
609 were produced as previously described<sup>73</sup>. For transduction of NOD-derived CTLs, stable  
610 Phoenix-eco cell lines were generated using amphotrophic retroviruses produced in  
611 293T cells. 293T cells were transiently transfected with the retroviral pP2 MSCV-puro  
612 vector encoding the CRM<sup>pMHCII $\beta$</sup>  or ScoR constructs, or pMSCV-ires-CFP II (gift from  
613 Dario Vignali, Addgene plasmid # 52109) containing the CRM<sup>pMHCII $\alpha$</sup>  constructs, in  
614 addition to the packaging plasmid, pUMVC (gift from Bob Weinberg, Addgene plasmid #  
615 8449)<sup>74</sup>, and the VSV-G envelope-expressing plasmid, pMD2.G (gift from Didier Trono,  
616 Addgene plasmid # 12259). Amphotrophic retroviral supernatant was collected 72 hr  
617 after transfection and used for the infection of Phoenix-eco cells (ATCC) by using  
618 Retronectin (Clontech). Transduced Phoenix-eco cells were sorted using either GFP,  
619 CFP, or CD80, as appropriate, and were used as stable producers of retroviruses for  
620 transduction of CTLs.

621

622 **Cell lines and Mice.**  $58\alpha^{-}\beta^{-}$  T cell hybridoma and M12 B cell lymphoma cell lines were  
623 cultured in RPMI 1640 (Gibco) supplemented with 5% FBS (Atlanta Biologicals), L-  
624 glutamine Pen-Strep solution (Hyclone), and 50mM 2-mercaptoethanol<sup>26,27</sup>. B10.A-

625 H2-T18/SgSnJ (B10.A) mice were purchased from Jackson Laboratory and  
626 5c.c7 TCR Tg x Rag2<sup>-/-</sup> [B10.A-Rag2<sup>tm1Fwa</sup> H2-T18<sup>a</sup> Tg (Tcra5CC7,Tcrb5CC7)]wep]  
627 mice were purchased from Taconic. They were maintained under specific pathogen-free  
628 conditions in the animal facility at the University of Arizona. NOD/ShiLtJ (NOD) mice,  
629 NOD.CB17-Prkdc<sup>scid</sup>/J (NOD SCID) mice and NOD.Cg-Tg  
630 (TCR $\alpha$ <sup>BDC2.5</sup>,TCR $\beta$ <sup>BDC2.5</sup>)1Doi/DoiJ (NOD.BDC2.5) mice were purchased from Jackson  
631 Laboratory. NOD.mRaspberry (mRasp) transgenic mice were a gift from Dr. Jason  
632 Gaglia. NOD.BDC2.5.mRasp transgenic mice were generated by interbreeding of  
633 NOD.BDC2.5 TCR transgenic mice with NOD.mRasp transgenic mice. NOD.BDC2.5,  
634 NOD.mRasp and NOD.BDC2.5.mRasp transgenic mice were bred at the Joslin  
635 Diabetes Center Animal Facility (Boston, MA). Mice were 0-14 weeks-old at the initiation  
636 of experiments. All strains were maintained under specific pathogen-free conditions at  
637 the Joslin Diabetes Center Animal Facility. All experiments involving animals were  
638 conducted under guidelines and approval by the University of Arizona and Joslin  
639 Institutional Animal Care and Use Committees.

640  
641 **Antibodies and reagents for flow cytometry and cell sorting.** The following  
642 antibodies were purchased from Biolegend: PE/Cy7 conjugated anti-mouse CD4  
643 (GK1.5), CD8 $\alpha$  (53-6.7), CD11b (M1/70), CD11b (N418), Gr-1 (56-8C5), B220 (RA3-6  
644 B2), CD25 (PC.61) and Granzyme B (QA16A02) antibodies; APC/Cy7 conjugated anti-  
645 mouse CD3 (17-A2), CD8 $\alpha$  (53-6.7) and IFN $\gamma$  (XMG1.2) antibodies; APC conjugated  
646 anti-mouse CD8 $\alpha$  (53-6.7), CD62L (MEL-14) and I-A<sup>d</sup> (39-10-8) antibodies; PE  
647 conjugated anti-mouse CD4 (GK1.5), CD80 (16-10A1), Perforin (S16009B) and FasL

648 (NOK-1) antibodies; PerCP/Cy5.5 conjugated anti-mouse CD4 (GK1.5) and Fas  
649 (SA367H8); Brilliant Violet (BV) 711 conjugated anti-mouse CD44 (IM7) antibody; BV  
650 785 conjugated anti-mouse CD11b (M1/70); and, biotin conjugated anti-mouse CD3 $\epsilon$   
651 (145-2C11). The following antibodies and reagents were obtained from BD Biosciences:  
652 BV605 streptavidin; and, FITC, PE, and Biotin conjugated anti-V $\beta$ 4 T-cell receptor  
653 antibodies. The following antibodies were purchased from eBiosciences: PE conjugated  
654 anti-mouse MHCII (M5/114.15.2); PE-Cy7 conjugated anti-mouse CD3 $\epsilon$  (145-2C11);  
655 and APC conjugated anti-mouse CD80 (16-10A1).

656  
657 **Generation of <sup>5</sup>M<sup>CAR</sup>-CTL.** Splenocytes from 5-10-week-old B10.A and NOD mice  
658 were stained with PE/Cy7 conjugated anti-mouse CD4 antibody. Negative selection was  
659 performed using anti-Cy7 microbeads (Miltenyi Biotech) according to the manufacturer's  
660 protocol. Unbound cells were collected and cultured for 24 hours in the presence of 1  
661  $\mu$ g/ml anti-mouse CD3 $\epsilon$  (145-2C11, BioLegend) and 0.5  $\mu$ g/ml CD28 (37.51,  
662 eBioscience) in RPMI (Gibco) supplemented with 10% heat-inactivated fetal bovine  
663 serum (FBS; Gemini), 100 unit/ml penicillin and streptomycin (HyClone), 1 mM sodium  
664 pyruvate (Gibco) and 2 mM L-Glutamine (Gibco). <sup>5</sup>M<sup>CAR</sup> retroviral supernatants: I-Ag<sup>7</sup> $\alpha$   
665 -TCR $\alpha$ , peptide:I-A<sup>97</sup> $\beta$ -TCR $\beta$  and CD80-LCK, were mixed at a 1:1:1 ratio and bound to  
666 retronectin (Clontech)-coated plates according to the manufacturer's protocol. The  
667 activated cells were added to the virus-bound plates after removing dead cells using  
668 Histopaque-1119 (Sigma-Aldrich), and centrifuged at 3200 x g for 90 min at 32°C.  
669 Murine IL-2 (50 unit/ml, Peprotech) was added immediately after transduction.  
670 Puromycin (2  $\mu$ g/ml, Sigma-Aldrich) was added 36 hours after transduction for selection

671 of <sup>5M</sup>CAR expressing cells. 4-6 days after transduction, dead cells were removed using  
672 Histopaque-1119, and live cells were used for experiments. Typically, 85% of cells in  
673 the cultures expressed the transduced <sup>5M</sup>CARs, as measured by flow cytometry.

674  
675 **Flow cytometry.** Cells were stained with monoclonal antibodies, incubated on ice in  
676 staining buffer for 20 minutes, and washed. Some experiments utilized secondary  
677 staining with conjugated streptavidin. For flow cytometry of live cells, after the final  
678 wash, cells were resuspended in staining buffer with DAPI (1 µg/ml) or PI (100 ng/ml) to  
679 enable exclusion of dead cells. For intracellular IFN<sub>γ</sub>, Granzyme B or Perforin staining, 4  
680 µM monensin (Sigma-Aldrich) was included in the final 3 hr of culture. Immediately  
681 following culture, cells were stained with Fixable Viability Dye eFluor 506 (eBioscience)  
682 to permanently stain dead cells. Surface molecules were stained, and then cells were  
683 fixed with 4% PFA at room temperature for 10 minutes and permeabilized with  
684 intracellular staining perm wash buffer (BioLegend), and stained with the appropriate  
685 intracellular antibodies. Analysis of stained cells was performed on an LSR Fortessa  
686 (BD Biosciences), and sorting was performed on a Cytomation MoFlo or a FACS Aria  
687 (BD Biosciences) at the Joslin Diabetes Center Flow Cytometry Core. Flow cytometry  
688 data were analyzed with FlowJo Version 10 software (Tree Star).

689  
690 **Flow-based fluorophore-linked immunosorbent assay (FFLISA).** 6.0 µm  
691 streptavidin-coated polystyrene microspheres (Polysciences) were further coated with  
692 biotinylated anti-mouse CD3<sub>ε</sub>, washed, and incubated with 0.5 ml of DDM (1% *n*-  
693 dodecyl-*b*-D-maltoside) lysates from 5x10<sup>6</sup> <sup>5M</sup>CAR 58α<sup>-</sup>β<sup>-</sup> cells at 4°C for 1 hour. After

694 washing, beads were probed with PE conjugated anti-mouse CD3 $\zeta$  (clone G3, Santa  
695 Cruz Biotechnology) and analyzed by flow cytometry<sup>14</sup>.

696

697 **ELISA.** All reagents for detection of IL-2 were purchased from Biolegend. Supernatants  
698 were collected after 16 hours of coculture of <sup>5M</sup>CAR 58 $\alpha$ <sup>-</sup> $\beta$ <sup>-</sup> cells and M12 target cells.

699 Anti-mouse IL-2 clone JES6-1A12 was used as a capture antibody and clone JES6-5H4  
700 was used as a secondary antibody. Streptavidin-HRP and TMB substrate were used for  
701 detection.

702

703 **Lymphocyte preparation.** Lymphocytes were obtained by forcing spleens, pancreatic  
704 lymph nodes (pLNs) or non-draining LNs through 70  $\mu$ m mesh. Red blood cells were  
705 lysed using ACK lysis buffer. Single cells from the pancreas were isolated by enzymic  
706 digestion with collagenase P. 1 mg/ml collagenase P (Roche) was directly injected into  
707 the pancreas. The pancreas was digested at 37°C for 8 minutes, blocked with PBS  
708 containing 10% FBS, and minced into small pieces on ice, dispersed by pipetting,  
709 filtered through a 70  $\mu$ m mesh, wash with 10% FBS in PBS. Single mononuclear cells  
710 were purified by density gradient centrifugation using Histopaque 1.077 (Sigma-Aldrich).

711

712 ***In vitro* killing, IFN $\gamma$  production, and proliferation.** For purification of CD4<sup>+</sup> T cells,  
713 splenocytes from NOD.mRasp or NOD.BDC2.5.mRasp transgenic mice were stained  
714 with PE/Cy7 conjugated anti-mouse CD8 $\alpha$ , CD11b, CD11c, B220 and Gr-1, and  
715 negatively selected using anti-Cy7 microbeads (Miltenyi Biotech) according to the  
716 manufactures' protocol. The unbound CD4<sup>+</sup> T cells were collected and used as target T

717 cells. CD4<sup>+</sup> T cell targets from 5c.c7 TCR Tg mice were not purified. Cells were co-  
718 cultured in 96-well U bottom plates. For killing assays, 1 x 10<sup>5</sup> target T cells were  
719 cultured alone, or with <sup>5M</sup>CAR-CTLs at different ratios for 16 hours. Target CD4 T<sup>+</sup> cells  
720 were identified as Vβ3<sup>+</sup>CD4<sup>+</sup>GFP<sup>-</sup>CD8<sup>-</sup> for 5c.c7 T cell targets and DAPI<sup>-</sup>  
721 mRasp<sup>+</sup>CD4<sup>+</sup>GFP<sup>-</sup>CD8<sup>-</sup> cells for BDC2.5 T cell targets. The numbers of target CD4<sup>+</sup> T  
722 cells that remained after 16hrs culture were then enumerated by flow cytometry. The  
723 number of target cells that remained in the absence of <sup>5M</sup>CAR-CTLs was used to  
724 establish a no-killing baseline that was then used to calculate the percent killing in the  
725 <sup>5M</sup>CAR-CTL samples. For the analysis of IFN $\gamma$  production, 1 x 10<sup>4</sup> <sup>5M</sup>CAR-CTLs were  
726 cultured with 1 x 10<sup>5</sup> target T cells for 6 hours. For the analysis of proliferating <sup>5M</sup>CAR-  
727 CTL, 1 x 10<sup>4</sup> <sup>5M</sup>CAR-CTLs labeled with 2  $\mu$ M CellTrace Violet (Invitrogen) were cultured  
728 with 1 x 10<sup>5</sup> NOD.BDC2.5.mRasp target CD4<sup>+</sup> T cells for 3-4 days. <sup>5M</sup>CAR-CTLs were  
729 identified as GFP<sup>+</sup>CD8<sup>+</sup>mRasp<sup>-</sup>CD4<sup>-</sup> cells. Absolute cell numbers were calculated using  
730 CountBright Absolute Counting Beads (Molecular Probes) on flow cytometry, or were  
731 counted directly by running the entire sample on the flow cytometer.

732

733 ***In vivo* killing assay.** CD4<sup>+</sup> T cells were purified from the spleens of NOD or  
734 NOD.BDC2.5.mRasp transgenic mice by negative selection as described above and  
735 were used as target T cells. NOD CD4<sup>+</sup> T cells were labeled with 10  $\mu$ M CellTrace  
736 Violet. 5-week-old female NOD recipient mice were retro-orbitally transplanted with  
737 GPI:I-A<sup>g7</sup> or RLGL-WE14:I-A<sup>g7</sup> <sup>5M</sup>CAR-CTLs (7 x 10<sup>6</sup> cells per mouse), and 12 hours  
738 later were transplanted with a 1:1 mix of CellTrace Violet labeled NOD CD4<sup>+</sup> T cells and  
739 NOD.BDC2.5.mRasp CD4<sup>+</sup> T cells (each 3.5 x 10<sup>6</sup> target cells per mouse). 5.5 hours

740 later the ratio of mRasp<sup>+</sup> BDC2.5 T cells to CellTrace Violet-labeled NOD T cells in the  
741 spleen of each recipient was determined by flow cytometry.

742

743 **Adoptive transfer.** For the experiments using the NOD-SCID T1D model,  
744 mRasp<sup>+</sup>CD4<sup>+</sup>CD8<sup>-</sup>CD25<sup>-</sup>CD62L<sup>+</sup>Vβ4<sup>+</sup> cells were obtained from the spleens of  
745 NOD.BDC2.5.mRasp transgenic mice and intravenously transplanted into NOD.SCID  
746 recipients (3 x 10<sup>5</sup> cells per recipient). 1 or 7 days later mice were received GPI:I-A<sup>g7</sup> or  
747 RLGL-WE14:I-A<sup>g7</sup> <sup>5M</sup>CAR-CTLs (6 x 10<sup>6</sup> cells per mouse). The mice were screened  
748 daily for body weight and glycosuria and/or blood glucose level. Mice were euthanized  
749 one day after diabetes onset, defined as two consecutive positive readings. Diabetes-  
750 free recipients were euthanized at the end point of experiment (day 21 or day 36).  
751 Target T cells were identified as DAPI<sup>-</sup>mRasp<sup>+</sup>CD3<sup>+</sup>GFP<sup>-</sup> or DAPI<sup>-</sup>mRasp<sup>+</sup>CD3<sup>+</sup>CD11b<sup>-</sup>  
752 GFP<sup>-</sup> cells, and <sup>5M</sup>CAR-CTLs were identified as DAPI<sup>-</sup>GFP<sup>+</sup>CD3<sup>+</sup>mRasp<sup>-</sup> or DAPI<sup>-</sup>  
753 GFP<sup>+</sup>CD3<sup>+</sup>CD11b<sup>-</sup>mRasp<sup>-</sup> cells. For the experiments using NOD mice as recipients, 3-5  
754 day old NOD mice were transplanted by facial vein injection with GPI:I-A<sup>g7</sup> <sup>5M</sup>CAR-CTLs  
755 (1 x 10<sup>6</sup> cells per mouse) or a mixture of <sup>5M</sup>CAR-CTLs (INSB:I-A<sup>g7</sup>, HIP2.5:I-A<sup>g7</sup>,  
756 HIP6.9:I-A<sup>g7</sup> and RLGL-WE14:I-A<sup>g7</sup>, each 2.5 x 10<sup>5</sup> cells, totaling 1 x 10<sup>6</sup> cells per  
757 mouse) and were screened weekly for glycosuria starting at 8 weeks of age. Diabetes  
758 was defined as two consecutive weekly readings positive for glycosuria.

759

760 **Histology.** Pancreases were harvested, embedded in OCT and frozen in isopentane.  
761 Pancreas sections were cut and stained with hematoxylin-eosin. Photos were taken by  
762 an Olympus VS120 slide scanner (Olympus) with x20 or x40 objective at Harvard



763 Medical School Neurobiology Imaging Facility. Images were acquired on an Olympus  
764 Olyvia at 2X, 4X or 20X magnification. Data was analyzed on GIMP software (The GNU  
765 image manipulation program, ver.2.8).

766

767 **Statistical analysis.** Statistical analysis was performed with GraphPad Prism software  
768 (La Jolla, CA) and with SAS software (v.9.4, Carry, NC). Results are expressed as  
769 mean  $\pm$  SD. Statistical significance of differences between the groups was determined  
770 as indicated in the figure legends for each experiment. Cox proportional hazards models  
771 were performed with ties in the failure time handled with exact conditional probabilities.  
772  $P < 0.05$  was considered statistically significant.

773

774 **References:**

- 775 1 Tubo, N. J. & Jenkins, M. K. TCR signal quantity and quality in CD4 T cell  
776 differentiation. *Trends Immunol* **35**, 591-596, doi:10.1016/j.it.2014.09.008 (2014).
- 777 2 Zehn, D., Lee, S. Y. & Bevan, M. J. Complete but curtailed T-cell response to very low-  
778 affinity antigen. *Nature* **458**, 211-214, doi:10.1038/nature07657 (2009).
- 779 3 Zhu, J., Yamane, H. & Paul, W. E. Differentiation of effector CD4 T cell populations (\*).  
780 *Annu Rev Immunol* **28**, 445-489, doi:10.1146/annurev-immunol-030409-101212  
781 (2010).
- 782 4 Jameson, S. C. & Masopust, D. Understanding Subset Diversity in T Cell Memory.  
783 *Immunity* **48**, 214-226, doi:10.1016/j.immuni.2018.02.010 (2018).
- 784 5 Josefowicz, S. Z., Lu, L. F. & Rudensky, A. Y. Regulatory T cells: mechanisms of  
785 differentiation and function. *Annu Rev Immunol* **30**, 531-564,  
786 doi:10.1146/annurev.immunol.25.022106.141623 (2012).
- 787 6 Chao, J. L. & Savage, P. A. Unlocking the Complexities of Tumor-Associated  
788 Regulatory T Cells. *J Immunol* **200**, 415-421, doi:10.4049/jimmunol.1701188  
789 (2018).
- 790 7 Eshhar, Z., Waks, T., Gross, G. & Schindler, D. G. Specific activation and targeting of  
791 cytotoxic lymphocytes through chimeric single chains consisting of antibody-

- 792 binding domains and the gamma or zeta subunits of the immunoglobulin and T-cell  
793 receptors. *Proc Natl Acad Sci U S A* **90**, 720-724 (1993).
- 794 8 Srivastava, S. & Riddell, S. R. Engineering CAR-T cells: Design concepts. *Trends*  
795 *Immunol* **36**, 494-502, doi:10.1016/j.it.2015.06.004 (2015).
- 796 9 Labanieh, L., Majzner, R. G. & Mackall, C. L. Programming CAR-T cells to kill cancer.  
797 *Nat Biomed Eng* **2**, 377-391, doi:10.1038/s41551-018-0235-9 (2018).
- 798 10 Watanabe, K. *et al.* Target antigen density governs the efficacy of anti-CD20-CD28-  
799 CD3 zeta chimeric antigen receptor-modified effector CD8+ T cells. *J Immunol* **194**,  
800 911-920, doi:10.4049/jimmunol.1402346 (2015).
- 801 11 Purbhoo, M. A., Irvine, D. J., Huppa, J. B. & Davis, M. M. T cell killing does not require  
802 the formation of a stable mature immunological synapse. *Nat Immunol* **5**, 524-530  
803 (2004).
- 804 12 Kuhns, M. S. & Davis, M. M. TCR Signaling Emerges from the Sum of Many Parts.  
805 *Front Immunol* **3**, 159, doi:10.3389/fimmu.2012.00159 (2012).
- 806 13 Rossjohn, J. *et al.* T cell antigen receptor recognition of antigen-presenting  
807 molecules. *Annu Rev Immunol* **33**, 169-200, doi:10.1146/annurev-immunol-032414-  
808 112334 (2015).
- 809 14 Glassman, C. R., Parrish, H. L., Deshpande, N. R. & Kuhns, M. S. The CD4 and  
810 CD3deltaepsilon Cytosolic Juxtamembrane Regions Are Proximal within a Compact  
811 TCR-CD3-pMHC-CD4 Macrocomplex. *J Immunol* **196**, 4713-4722,  
812 doi:10.4049/jimmunol.1502110 (2016).
- 813 15 Glassman, C. R., Parrish, H. L., Lee, M. S. & Kuhns, M. S. Reciprocal TCR-CD3 and CD4  
814 Engagement of a Nucleating pMHCII Stabilizes a Functional Receptor Macrocomplex.  
815 *Cell Rep* **22**, 1263-1275, doi:10.1016/j.celrep.2017.12.104 (2018).
- 816 16 Naeher, D., Luescher, I. F. & Palmer, E. A role for the alpha-chain connecting peptide  
817 motif in mediating TCR-CD8 cooperation. *J Immunol* **169**, 2964-2970 (2002).
- 818 17 Van Laethem, F. *et al.* Deletion of CD4 and CD8 coreceptors permits generation of  
819 alphabetaT cells that recognize antigens independently of the MHC. *Immunity* **27**,  
820 735-750, doi:S1074-7613(07)00491-8 [pii]  
821 10.1016/j.immuni.2007.10.007 (2007).
- 822 18 Irvine, D. J., Purbhoo, M. A., Krosgaard, M. & Davis, M. M. Direct observation of  
823 ligand recognition by T cells. *Nature* **419**, 845-849, doi:10.1038/nature01076  
824 nature01076 [pii] (2002).

- 825 19 Corse, E., Gottschalk, R. A., Krogsgaard, M. & Allison, J. P. Attenuated T cell responses  
826 to a high-potency ligand in vivo. *PLoS Biol* **8**, doi:10.1371/journal.pbio.1000481  
827 (2010).
- 828 20 Tubo, N. J. *et al.* Single naive CD4+ T cells from a diverse repertoire produce  
829 different effector cell types during infection. *Cell* **153**, 785-796,  
830 doi:10.1016/j.cell.2013.04.007 (2013).
- 831 21 Holst, J. *et al.* Scalable signaling mediated by T cell antigen receptor-CD3 ITAMs  
832 ensures effective negative selection and prevents autoimmunity. *Nat Immunol* **9**,  
833 658-666 (2008).
- 834 22 Govern, C. C., Paczosa, M. K., Chakraborty, A. K. & Huseby, E. S. Fast on-rates allow  
835 short dwell time ligands to activate T cells. *Proc Natl Acad Sci U S A* **107**, 8724-8729,  
836 doi:10.1073/pnas.1000966107 (2010).
- 837 23 Allison, K. A. *et al.* Affinity and dose of TCR engagement yield proportional enhancer  
838 and gene activity in CD4+ T cells. *eLife* **5**, doi:10.7554/eLife.10134 (2016).
- 839 24 Yokosuka, T. *et al.* Spatiotemporal regulation of T cell costimulation by TCR-CD28  
840 microclusters and protein kinase C theta translocation. *Immunity* **29**, 589-601,  
841 doi:10.1016/j.immuni.2008.08.011 (2008).
- 842 25 Yokosuka, T. *et al.* Spatiotemporal basis of CTLA-4 costimulatory molecule-mediated  
843 negative regulation of T cell activation. *Immunity* **33**, 326-339,  
844 doi:10.1016/j.immuni.2010.09.006 (2010).
- 845 26 Letourneur, F. & Malissen, B. Derivation of a T cell hybridoma variant deprived of  
846 functional T cell receptor alpha and beta chain transcripts reveals a nonfunctional  
847 alpha-mRNA of BW5147 origin. *Eur J Immunol* **19**, 2269-2274,  
848 doi:10.1002/eji.1830191214 (1989).
- 849 27 Kim, K. J., Kanellopoulos-Langevin, C., Merwin, R. M., Sachs, D. H. & Asofsky, R.  
850 Establishment and characterization of BALB/c lymphoma lines with B cell  
851 properties. *J Immunol* **122**, 549-554 (1979).
- 852 28 Newell, E. W. *et al.* Structural basis of specificity and cross-reactivity in T cell  
853 receptors specific for cytochrome c-I-E(k). *J Immunol* **186**, 5823-5832,  
854 doi:10.4049/jimmunol.1100197 (2011).
- 855 29 Evavold, B. D., Williams, S. G., Hsu, B. L., Buus, S. & Allen, P. M. Complete dissection of  
856 the Hb(64-76) determinant using T helper 1, T helper 2 clones, and T cell  
857 hybridomas. *J Immunol* **148**, 347-353 (1992).
- 858 30 Katz, J. D., Wang, B., Haskins, K., Benoist, C. & Mathis, D. Following a diabetogenic T  
859 cell from genesis through pathogenesis. *Cell* **74**, 1089-1100 (1993).

- 860 31 Berry, G. & Waldner, H. Accelerated type 1 diabetes induction in mice by adoptive  
861 transfer of diabetogenic CD4+ T cells. *J Vis Exp*, e50389, doi:10.3791/50389 (2013).
- 862 32 Jin, N. *et al.* N-terminal additions to the WE14 peptide of chromogranin A create  
863 strong autoantigen agonists in type 1 diabetes. *Proc Natl Acad Sci U S A* **112**, 13318-  
864 13323, doi:10.1073/pnas.1517862112 (2015).
- 865 33 Basu, D., Horvath, S., Matsumoto, I., Fremont, D. H. & Allen, P. M. Molecular basis for  
866 recognition of an arthritic peptide and a foreign epitope on distinct MHC molecules  
867 by a single TCR. *J Immunol* **164**, 5788-5796 (2000).
- 868 34 Krummel, M. F. & Allison, J. P. CD28 and CTLA-4 have opposing effects on the  
869 response of T cells to stimulation. *J Exp Med* **182**, 459-465 (1995).
- 870 35 Lopez, J. A. *et al.* Perforin forms transient pores on the target cell plasma membrane  
871 to facilitate rapid access of granzymes during killer cell attack. *Blood* **121**, 2659-  
872 2668, doi:10.1182/blood-2012-07-446146 (2013).
- 873 36 Sykulev, Y., Joo, M., Vturina, I., Tsomides, T. J. & Eisen, H. N. Evidence that a single  
874 peptide-MHC complex on a target cell can elicit a cytolytic T cell response. *Immunity*  
875 **4**, 565-571 (1996).
- 876 37 Barber, D. L., Wherry, E. J. & Ahmed, R. Cutting edge: rapid in vivo killing by memory  
877 CD8 T cells. *J Immunol* **171**, 27-31 (2003).
- 878 38 Anderson, M. S. & Bluestone, J. A. The NOD mouse: a model of immune  
879 dysregulation. *Annu Rev Immunol* **23**, 447-485,  
880 doi:10.1146/annurev.immunol.23.021704.115643 (2005).
- 881 39 Miyazaki, A. *et al.* Predominance of T lymphocytes in pancreatic islets and spleen of  
882 pre-diabetic non-obese diabetic (NOD) mice: a longitudinal study. *Clin Exp Immunol*  
883 **60**, 622-630 (1985).
- 884 40 Makino, S. *et al.* Breeding of a non-obese, diabetic strain of mice. *Jikken Dobutsu* **29**,  
885 1-13, doi:10.1538/expanim1978.29.1\_1 (1980).
- 886 41 Michels, A. W. *et al.* Islet-Derived CD4 T Cells Targeting Proinsulin in Human  
887 Autoimmune Diabetes. *Diabetes* **66**, 722-734, doi:10.2337/db16-1025 (2017).
- 888 42 Nakayama, M. *et al.* Prime role for an insulin epitope in the development of type 1  
889 diabetes in NOD mice. *Nature* **435**, 220-223, doi:10.1038/nature03523 (2005).
- 890 43 Delong, T. *et al.* Pathogenic CD4 T cells in type 1 diabetes recognize epitopes formed  
891 by peptide fusion. *Science* **351**, 711-714, doi:10.1126/science.aad2791 (2016).
- 892 44 Liu, B. *et al.* A Hybrid Insulin Epitope Maintains High 2D Affinity for Diabetogenic T  
893 Cells in the Periphery. *Diabetes*, doi:10.2337/db19-0399 (2019).

- 894 45 Ogawa, M. *et al.* The Inhibitory Effect of Neonatal Thymectomy on the Incidence of  
895 Insulinitis in Non-Obese Diabetes (Nod) Mice. *Biomed Res-Tokyo* **6**, 103-105 (1985).
- 896 46 Turley, S., Poirot, L., Hattori, M., Benoist, C. & Mathis, D. Physiological beta cell death  
897 triggers priming of self-reactive T cells by dendritic cells in a type-1 diabetes model.  
898 *J Exp Med* **198**, 1527-1537, doi:10.1084/jem.20030966 (2003).
- 899 47 den Braber, I. *et al.* Maintenance of peripheral naive T cells is sustained by thymus  
900 output in mice but not humans. *Immunity* **36**, 288-297,  
901 doi:10.1016/j.immuni.2012.02.006 (2012).
- 902 48 Aivazian, D. & Stern, L. J. Phosphorylation of T cell receptor zeta is regulated by a  
903 lipid dependent folding transition. *Nat Struct Biol* **7**, 1023-1026 (2000).
- 904 49 Xu, C. *et al.* Regulation of T cell receptor activation by dynamic membrane binding of  
905 the CD3epsilon cytoplasmic tyrosine-based motif. *Cell* **135**, 702-713, doi:S0092-  
906 8674(08)01237-3 [pii]  
907 10.1016/j.cell.2008.09.044 (2008).
- 908 50 Swamy, M. *et al.* A Cholesterol-Based Allosteric Model of T Cell Receptor  
909 Phosphorylation. *Immunity* **44**, 1091-1101, doi:10.1016/j.immuni.2016.04.011  
910 (2016).
- 911 51 DeFord-Watts, L. M., Young, J. A., Pitcher, L. A. & van Oers, N. S. The membrane-  
912 proximal portion of CD3 epsilon associates with the serine/threonine kinase GRK2. *J*  
913 *Biol Chem* **282**, 16126-16134, doi:M609418200 [pii]  
914 10.1074/jbc.M609418200 (2007).
- 915 52 Martinez-Martin, N. *et al.* Cooperativity between T cell receptor complexes revealed  
916 by conformational mutants of CD3epsilon. *Sci Signal* **2**, ra43, doi:2/83/ra43 [pii]  
917 10.1126/scisignal.2000402 (2009).
- 918 53 Notarangelo, L. D. Immunodeficiency and immune dysregulation associated with  
919 proximal defects of T cell receptor signaling. *Curr Opin Immunol* **31C**, 97-101,  
920 doi:10.1016/j.coi.2014.10.003 (2014).
- 921 54 Liston, A., Enders, A. & Siggs, O. M. Unravelling the association of partial T-cell  
922 immunodeficiency and immune dysregulation. *Nature reviews. Immunology* **8**, 545-  
923 558, doi:10.1038/nri2336 (2008).
- 924 55 James, J. R. Tuning ITAM multiplicity on T cell receptors can control potency and  
925 selectivity to ligand density. *Sci Signal* **11**, doi:10.1126/scisignal.aan1088 (2018).
- 926 56 Baeuerle, P. A. *et al.* Synthetic TRuC receptors engaging the complete T cell receptor  
927 for potent anti-tumor response. *Nat Commun* **10**, 2087, doi:10.1038/s41467-019-  
928 10097-0 (2019).

- 929 57 Savage, P. A., Boniface, J. J. & Davis, M. M. A kinetic basis for T cell receptor  
930 repertoire selection during an immune response. *Immunity* **10**, 485-492 (1999).
- 931 58 Savage, P. A. & Davis, M. M. A kinetic window constricts the T cell receptor  
932 repertoire in the thymus. *Immunity* **14**, 243-252 (2001).
- 933 59 D'Ippolito, E., Schober, K., Nauwerth, M. & Busch, D. H. T cell engineering for adoptive  
934 T cell therapy: safety and receptor avidity. *Cancer Immunol Immunother*,  
935 doi:10.1007/s00262-019-02395-9 (2019).
- 936 60 Stone, J. D. & Kranz, D. M. Role of T cell receptor affinity in the efficacy and specificity  
937 of adoptive T cell therapies. *Front Immunol* **4**, 244, doi:10.3389/fimmu.2013.00244  
938 (2013).
- 939 61 Gross, G., Waks, T. & Eshhar, Z. Expression of immunoglobulin-T-cell receptor  
940 chimeric molecules as functional receptors with antibody-type specificity. *Proc Natl  
941 Acad Sci U S A* **86**, 10024-10028 (1989).
- 942 62 Kohler, G. Derivation and diversification of monoclonal antibodies. *Science* **233**,  
943 1281-1286, doi:10.1126/science.3092353 (1986).
- 944 63 Chen, L. & Flies, D. B. Molecular mechanisms of T cell co-stimulation and co-  
945 inhibition. *Nat Rev Immunol* **13**, 227-242, doi:10.1038/nri3405 (2013).
- 946 64 Fishman, S. *et al.* Adoptive Transfer of mRNA-Transfected T Cells Redirected against  
947 Diabetogenic CD8 T Cells Can Prevent Diabetes. *Molecular therapy : the journal of the  
948 American Society of Gene Therapy* **25**, 456-464, doi:10.1016/j.ymthe.2016.12.007  
949 (2017).
- 950 65 Insel, R. A. *et al.* Staging presymptomatic type 1 diabetes: a scientific statement of  
951 JDRF, the Endocrine Society, and the American Diabetes Association. *Diabetes Care*  
952 **38**, 1964-1974, doi:10.2337/dc15-1419 (2015).
- 953 66 Grau-Lopez, L. *et al.* Myelin peptides in multiple sclerosis. *Autoimmun Rev* **8**, 650-  
954 653, doi:10.1016/j.autrev.2009.02.013 (2009).
- 955 67 Jyothi, M. D., Flavell, R. A. & Geiger, T. L. Targeting autoantigen-specific T cells and  
956 suppression of autoimmune encephalomyelitis with receptor-modified T  
957 lymphocytes. *Nat Biotechnol* **20**, 1215-1220, doi:10.1038/nbt758 (2002).
- 958 68 Szczepanski, T. *et al.* Comparative analysis of T-cell receptor gene rearrangements at  
959 diagnosis and relapse of T-cell acute lymphoblastic leukemia (T-ALL) shows high  
960 stability of clonal markers for monitoring of minimal residual disease and reveals  
961 the occurrence of second T-ALL. *Leukemia* **17**, 2149-2156,  
962 doi:10.1038/sj.leu.2403081 (2003).



- 963 69 Fujii, K. & Kanekura, T. Next-Generation Sequencing Technologies for Early-Stage  
964 Cutaneous T-Cell Lymphoma. *Front Med (Lausanne)* **6**, 181,  
965 doi:10.3389/fmed.2019.00181 (2019).
- 966 70 Gee, M. H. *et al.* Antigen Identification for Orphan T Cell Receptors Expressed on  
967 Tumor-Infiltrating Lymphocytes. *Cell* **172**, 549-563 e516,  
968 doi:10.1016/j.cell.2017.11.043 (2018).
- 969 71 Joglekar, A. V. *et al.* T cell antigen discovery via signaling and antigen-presenting  
970 bifunctional receptors. *Nat Methods* **16**, 191-198, doi:10.1038/s41592-018-0304-8  
971 (2019).
- 972 72 Millman, J. R. *et al.* Generation of stem cell-derived beta-cells from patients with type  
973 1 diabetes. *Nat Commun* **7**, 11463, doi:10.1038/ncomms11463 (2016).
- 974 73 Kuhns, M. S. & Davis, M. M. Disruption of extracellular interactions impairs T cell  
975 receptor-CD3 complex stability and signaling. *Immunity* **26**, 357-369, doi:S1074-  
976 7613(07)00177-X [pii]  
977 10.1016/j.immuni.2007.01.015 (2007).
- 978 74 Stewart, S. A. *et al.* Lentivirus-delivered stable gene silencing by RNAi in primary  
979 cells. *RNA* **9**, 493-501, doi:10.1261/rna.2192803 (2003).  
980

## 981 **Acknowledgements**

982 This work was supported by The University of Arizona College of Medicine (MSK), the  
983 BIO5 Institute (MSK), National Institutes of Health/National Institute of Allergy and  
984 Infections Diseases Grant R01AI101053 (MSK), the Pew Scholars Program in the  
985 Biomedical Sciences (MSK), charitable donations to the UA Foundation (MSK), the  
986 Cancer Center Support Grant CCSG-CA 023074 for flow cytometry (MSK), the Fleisher  
987 Family Foundation (TS), the Alexander and Margaret Stewart Trust (TS), the Iacocca  
988 Family Foundation (SK, MAT), the Swedish Society of Medicine and the Swedish  
989 Society of Medical Research (MAT). Statistical analysis (MAN) was conducted with  
990 support from Harvard Catalyst | The Harvard Clinical and Translational Science Center  
991 (National Center for Advancing Translational Sciences, National Institutes of Health  
992 Award UL 1TR002541). The JDC Flow Cytometry Core is supported by a National

993 Institute of Health grants (P30-DK-036836 and S10OD021740). We thank Amy Wagers  
994 for additional support and critical feedback. We thank David Duron, Karen Hernandez,  
995 and Lacey Orsini for technical assistance with generation of constructs. The authors  
996 also thank Deepta Bhattacharya, Alfred Bothwell, Michael Worobey, and Joonsoo Kang  
997 for critically reading the manuscript.

998

### 999 **Author's Contributions**

1000 M.S.K. and T.S. conceived of the project and directed the research. M.S.K. conceived of  
1001 and designed the  $5^M$ CARs. The manuscript was written by S.K., T.S., and M.S.K. All  
1002 authors contributed to data analysis, discussions, editing, reading and approval of the  
1003 manuscript. H.L.P., N.R.D., and M.S.L. generated and performed *in vitro* experiments  
1004 with the  $5^M$ CAR- $58\alpha\beta^-$  cells and B10.A-derived  $5^M$ CAR-CTLs, while S.K. and M.A.T.  
1005 generated and performed *in vitro* experiments with NOD-derived  $5^M$ CAR-CTLs. S.K. and  
1006 M.A.T. performed experiments in NOD-SCID mice while S.K. and A.K. performed long-  
1007 term experiments in NOD mice. M.A.N. performed statistical analysis.



## 1008 Figure Legends

1009 **Fig. 1: Structure, assembly, and function of biomimetic <sup>5M</sup>CARs.** **a**, The 5 modules  
1010 that drive pMHC-specific T cell activation (TCR, CD3 $\gamma\epsilon$ , CD3 $\delta\epsilon$ , CD3 $\zeta\zeta$ , and CD4/CD8)  
1011 are illustrated in comparison with a 3<sup>rd</sup> generation single-module CAR (<sup>1M</sup>CAR). **b**,  
1012 Illustration of the TCR-CD3 complex and CD8 in comparison with the CRM<sup>pMHCII</sup>-CD3  
1013 complex and CD80-Lck ScoR of <sup>5M</sup>CARs. **c**, Flow cytometry plots showing I-E<sup>k</sup>, CD3,  
1014 and CD80 expression on parental 58 $\alpha\beta$ <sup>-</sup> cells and MCC:I-E<sup>k+</sup> <sup>5M</sup>CAR-58 $\alpha\beta$ <sup>-</sup> cells. **d**,  
1015 FFLISA of TCR-CD3 and CRM<sup>pMHCII</sup>-CD3 complexes. Anti-CD3 $\epsilon$  beads incubated  
1016 without lysate (grey), or with lysates from TCR-CD3<sup>+</sup> 58 $\alpha\beta$ <sup>-</sup> cells or MCC:I-E<sup>k+</sup> <sup>5M</sup>CAR-  
1017 58 $\alpha\beta$ <sup>-</sup> cells (black), were analyzed by flow cytometry for TCR $\beta$  or CRM<sup>pMHCII</sup> $\beta$  (GFP) and  
1018 CD3 $\zeta$  association. **e**, IL-2 production by MCC:I-E<sup>k+</sup> <sup>5M</sup>CAR-58 $\alpha\beta$ <sup>-</sup> cells after 16hr  
1019 coculture with parental M12 B cells (TCR<sup>-</sup>, CD28<sup>-</sup>), 2B4 TCR<sup>+</sup> M12 cells, or 2B4 TCR<sup>+</sup>  
1020 CD28<sup>+</sup> M12 cells was quantified by ELISA (\*\*\*\*p < 0.0001, one-way ANOVA with  
1021 Tukey's posttest). **f**, <sup>5M</sup>CAR-CTL killing of CD4<sup>+</sup> 5c.c7 TCR Tg T cell targets. Percent  
1022 killing of targets co-cultured with control (Hb:I-E<sup>k</sup>) or specific (MCC:I-E<sup>k+</sup>) <sup>5M</sup>CAR-CTLs  
1023 was measured by flow cytometry and is presented relative to number of targets cultured  
1024 in the absence of <sup>5M</sup>CAR-CTLs (\*p < 0.05, \*\*\*p < 0.001, \*\*\*\*p < 0.0001 by unpaired,  
1025 two-tailed *t*-test). All data are representative of at least 2 experiments.

1026  
1027 **Fig. 2: <sup>5M</sup>CARs redirect CTL function to target autoimmune CD4<sup>+</sup> T cells.** **a**, <sup>5M</sup>CAR-  
1028 CTL killing of target BDC2.5 CD4<sup>+</sup> T cells (left) or control NOD CD4<sup>+</sup> T cells (right) after  
1029 co-culture with control (GPI:I-Ag7) or specific (RLGL-WE14:I-A<sup>g7</sup>) <sup>5M</sup>CAR-CTLs is  
1030 presented as in Fig. 1 (\*\*\*\*p < 0.0001 by unpaired, two-tailed *t*-test). **b**, IFN $\gamma$  production  
1031 by <sup>5M</sup>CAR-CTLs. <sup>5M</sup>CAR-CTLs incubated with target BDC2.5 T cells or NOD T cells for 6  
1032 hrs were stained for intracellular IFN $\gamma$  and gated on live cells. Representative plots are  
1033 shown. The bar graph shows the frequency of IFN $\gamma$  producing <sup>5M</sup>CAR-CTLs gated on  
1034 GFP<sup>+</sup>CD8<sup>+</sup>mRasp<sup>+</sup>CD4<sup>-</sup> cells (\*\*\*\*p < 0.0001 by one-way ANOVA and Tukey's post  
1035 test). **c**, Proliferation of CellTrace violet labeled <sup>5M</sup>CAR-CTLs after co-culture with or  
1036 without target BDC2.5 T cells for 3 days. Representative histograms show CellTrace  
1037 violet dilution of <sup>5M</sup>CAR-CTLs. Bar graphs show the number of dividing <sup>5M</sup>CAR-CTLs  
1038 (\*\*\*\*p < 0.0001 by one-way ANOVA and Tukey's multiple comparison test). **d**, The  
1039 number of specific <sup>4M</sup>CAR- (without ScoR) or <sup>5M</sup>CAR-CTLs (with ScoR) making IFN $\gamma$   
1040 were measured by flow cytometry after coculture with target BDC2.5 T cells for 6 hrs. **e**,  
1041 The number of divided specific <sup>4M</sup>CAR- (without ScoR) or <sup>5M</sup>CAR-CTLs (with ScoR)  
1042 were by determined by flow cytometry after coculture with target BDC2.5 T cells for 3 or  
1043 4 days. Columns in **a-c** are show mean  $\pm$  SD of triplicates or quadruplicates. Each  
1044 graph is representative of 3 independent experiments. Lined data points in **d,e**, are  
1045 shown as mean  $\pm$  SD of triplicates or quadruplicates (\*p < 0.05 by paired, two-tailed *t*-  
1046 test). Each line represents an independent experiment.

1047  
1048 **Fig. 3: <sup>5M</sup>CAR-CTLs kill target T cells *in vivo*.** Control (GPI:I-A<sup>g7</sup>) or specific (RLGL-  
1049 WE14:I-A<sup>g7</sup>) <sup>5M</sup>CAR-CTLs were adoptively transferred into NOD mice followed 12 hrs  
1050 later with a mixture of mRasp<sup>+</sup> BDC2.5 CD4<sup>+</sup> T cells targets and CellTrace Violet-  
1051 labeled NOD CD4<sup>+</sup> T cells as a reference population. 5.5 hrs later the spleens were  
1052 analyzed by flow cytometry to determine the extent of target cell killing. Plots show

1053 analysis of target and control cells in representative mice, gated live CD3<sup>+</sup>CD4<sup>+</sup> cells  
1054 (full gating shown in **Fig S3**). The graph shows the ratio of target cells/control cells as  
1055 mean  $\pm$  SD. Each point represents the ratio from a single spleen (\* $p < 0.05$ , \*\*\* $p < 0.001$   
1056 by one-way ANOVA and Tukey's posttest). Data are shown as mean  $\pm$  SD of combined  
1057 from two independent experiments.

1058  
1059 **Fig. 4: <sup>5M</sup>CAR-CTLs prevent BDC2.5 CD4<sup>+</sup> T cell-induced T1D in NOD-SCID mice.**  
1060 **a**, BDC2.5 CD4<sup>+</sup> T cells were adoptively transferred into NOD-SCID mice on day 0. On  
1061 day 1 the mice were either treated with <sup>5M</sup>CAR-CTLs or left untreated. **b**, Survival curve  
1062 shows the percentage of diabetes-free mice that were treated with either control (GPI:I-  
1063 A<sup>g7</sup>) <sup>5M</sup>CAR-CTLs, specific (RLGL-WE14:I-A<sup>g7</sup>) <sup>5M</sup>CAR-CTLs, or left untreated (BDC2.5  
1064 only) (\*\* $p < 0.01$ , \*\*\* $p < 0.001$  by log-rank test). **c**, Pancreases of representative mice  
1065 from each group are shown stained with hematoxylin-eosin (Magnification: 4X). Black  
1066 box inset shows clear islet (20X, scale bar = 200 $\mu$ m). **d,e**, Analysis of mRasp<sup>+</sup> target  
1067 CD4<sup>+</sup> T cells and GFP<sup>+</sup> <sup>5M</sup>CAR-CTLs in spleens of treated and untreated mice. **d**,  
1068 Gating schematic for the analysis. **e**, Representative dot plots show frequencies of  
1069 targets and <sup>5M</sup>CAR-CTLs in spleens. Graphs show absolute cell counts of BDC2.5 CD4<sup>+</sup>  
1070 T cells or <sup>5M</sup>CAR-CTLs. Each point represents an individual recipient. Horizontal lines  
1071 indicate mean  $\pm$  SD [ $**p < 0.01$ , \*\*\*\* $p < 0.0001$  by one-way ANOVA and Tukey's  
1072 posttest (bottom, left) or unpaired, two-tailed  $t$ -test (bottom, right). ns means not  
1073 statistically significant. Data are representative of two similar independent experiments.  
1074 Numbers of mice/group are indicated in the figure.

1075  
1076 **Fig. 5: <sup>5M</sup>CAR-CTLs prevent diabetes after initiation of insulinitis.** NOD-SCID mice  
1077 receiving BDC2.5 CD4<sup>+</sup> T cells on day 0 were treated with <sup>5M</sup>CAR-CTLs on day 7, or left  
1078 untreated. **b**, Survival curve shows the percentage of diabetes-free mice treated with  
1079 either control (GPI:I-A<sup>g7</sup>) <sup>5M</sup>CAR-CTLs, specific (RLGL-WE14:I-A<sup>g7</sup>) <sup>5M</sup>CAR-CTLs, or left  
1080 untreated (BDC2.5 only) (\*\* $p < 0.01$ , \*\*\* $p < 0.001$  by log-rank test). **c**, Pancreases of  
1081 representative mice from each group, stained with hematoxylin-eosin, are shown  
1082 (Magnification: 4X). Black box inset shows clear islet (20X, scale bar = 200 $\mu$ m). **d,e**,  
1083 Analysis of mRasp<sup>+</sup> CD4<sup>+</sup> T cells and GFP<sup>+</sup> <sup>5M</sup>CAR-CTLs in spleens of treated and  
1084 untreated mice. **d**, Gating schematic for the analysis. **e**, Representative dot plots show  
1085 frequencies of targets and <sup>5M</sup>CAR-CTLs in spleens. Graphs show absolute cell counts  
1086 of BDC2.5 T cells or <sup>5M</sup>CAR-CTLs. Each data point represents an individual recipient.  
1087 Horizontal lines indicate mean  $\pm$  SD. \* $p < 0.05$  by one-way ANOVA and Tukey's multiple  
1088 comparison test (bottom, left) or by unpaired, two-tailed  $t$ -test (bottom, right). ns means  
1089 not statistically significant. Data are combined from two independent experiments.  
1090 Numbers of mice/group are indicated in the figure.

1091  
1092 **Fig. 6: <sup>5M</sup>CAR-CTLs migrate to the pancreas and eliminate BDC2.5 CD4<sup>+</sup> T cells.**  
1093 NOD-SCID mice receiving BDC2.5 T cells (day 0) were either treated with control  
1094 (GPI:I-A<sup>g7</sup>) <sup>5M</sup>CAR-CTLs, specific (RLGL-WE14:I-A<sup>g7</sup>) <sup>5M</sup>CAR-CTLs, or euthanized prior  
1095 to treatment on day 7. Treated groups were euthanized on day 8, 10, 15 or 36. Flow  
1096 cytometry was used to determine the frequency and number of mRasp<sup>+</sup> CD4<sup>+</sup> BDC2.5 T  
1097 cells and GFP<sup>+</sup> <sup>5M</sup>CAR-CTLs in the pLNs (**a**) or pancreases (**b**). **a,b**, Representative dot  
1098 plots show frequencies of target BDC2.5 T cells, and <sup>5M</sup>CAR-CTLs (top panels, pre-

1099 gated on live, CD11b<sup>-</sup> cells). Graphs show the number of CD4<sup>+</sup> BDC2.5 T cells (left) or  
1100 or change of the number of <sup>5M</sup>CAR-CTLs (right). Data show combined results from two  
1101 independent experiments as mean ± SD. 3-6 mice were analyzed for each group and  
1102 time point (\*p < 0.05, \*\*p < 0.01 by unpaired, two-tailed *t*-test between the control and  
1103 specific <sup>5M</sup>CAR-CTLs groups). † means no data. Numbers of mice/group are indicated  
1104 in the figure.

1105  
1106 **Fig. 7: Treatment with an oligoclonal set of specific <sup>5M</sup>CAR-CTLs decreases**  
1107 **diabetes incidence in NOD mice.** Newborn NOD mice received control (GPI:I-A<sup>g7</sup>)  
1108 <sup>5M</sup>CAR-CTLs, a mixture of specific <sup>5M</sup>CAR-CTLs targeting four populations of T1D-  
1109 related autoimmune T cell (INSB:I-A<sup>g7</sup>, HIP2.5:I-A<sup>g7</sup>, HIP6.9:I-A<sup>g7</sup> and RLGL-WE14:I-  
1110 A<sup>g7</sup>), or were left untreated. **a**, A subset of male mice were euthanized at 13 weeks of  
1111 age, and their spleens were analyzed by flow cytometry. <sup>5M</sup>CAR-CTLs were identified by  
1112 CD8 and GFP expression (pre-gated on live, CD3<sup>+</sup> cells). Plots from representative  
1113 engrafted mice are shown (5/5 control <sup>5M</sup>CAR-CTL recipients engrafted, 5/6 specific  
1114 <sup>5M</sup>CAR-CTL recipients engrafted). **b**, Female mice were screened weekly for glycosuria  
1115 from day 32 to day 315 and cumulative incidence of diabetes (survival probability plots  
1116 based on the Kaplan-Meier method) are shown with exact p values determined by log-  
1117 rank test. Data show the combined results from three independent cohorts. Numbers of  
1118 mice/group are indicated in the figure.

## 1119 **Supplementary Figure Legends**

1120

### 1121 **Supplementary Figure 1 (Corresponding to Fig 1): Design of <sup>5M</sup>CAR system.**

1122 a, Drawing of proposed interaction between <sup>5M</sup>CAR-CTLs and pathogenic CD4<sup>+</sup> T cells.

1123

### 1124 **Supplementary Figure 2 (Corresponding to Fig 2): <sup>5M</sup>CAR-CTL phenotype and**

1125 **killing.** a, Representative histograms showing I-A<sup>g7</sup> (left) and CD80 (right) expression  
1126 on <sup>5M</sup>CAR-CTLs (solid line) compared with untransduced CD8<sup>+</sup> CTLs (shaded  
1127 histogram). Data represent at least three independent experiments. b, CD44 and  
1128 CD62L expression of <sup>5M</sup>CAR-CTLs were measured. Data shows the proportion of each  
1129 <sup>5M</sup>CAR-CTL subset as mean ± SD of triplicates from three independent experiments. c,  
1130 Representative histograms of Granzyme B (left) and Perforin (right) expression by  
1131 <sup>5M</sup>CAR-CTLs. d, Representative histograms of FasL (left) and Fas (right) expression by  
1132 <sup>5M</sup>CAR-CTLs. a-d, RLGL-WE14:I-A<sup>g7</sup> <sup>5M</sup>CAR-CTLs 4 days post-transduction were  
1133 stained. Histograms were gated on GFP<sup>+</sup>CD8<sup>+</sup> cells. e, Normalized frequency of  
1134 surviving target BDC2.5 T cells after a 16 hr coculture with either <sup>4M</sup>CAR-CTLs (without  
1135 ScoR) or <sup>5M</sup>CAR-CTLs (with ScoR) at several E:T ratios. Control CARs were GPI:IA<sup>g7</sup>  
1136 and Specific CARs were (RLGL-WE14:I-A<sup>g7</sup>). Surviving target cells were defined as  
1137 DAPI<sup>-</sup> mRasp<sup>+</sup>CD4<sup>+</sup>GFP<sup>-</sup>CD8<sup>-</sup>. \*\*p < 0.01, \*\*\*p < 0.001, \*\*\*\*p < 0.0001 by unpaired, two-  
1138 tailed *t*-test. Columns are shown as mean ± SD of triplicates. The graph is  
1139 representative of 2 independent experiments.

1140

### 1141 **Supplementary Figure 3 (Corresponding to Fig 3): Gating scheme for *in vivo***

1142 **killing assay.** Flow cytometry of target T cells and <sup>5M</sup>CAR-CTLs in NOD mice.  
1143 Representative FACS plots show the gating strategy to identify mRasp<sup>+</sup> CD4<sup>+</sup> BDC2.5  
1144 target T cells and CellTrace Violet<sup>+</sup> NOD control T cells for the data shown in Fig. 3.

1145

### 1146 **Supplementary Figure 4 (Corresponding to Fig 4): Time course of insulinitis and**

1147 **diabetes development in NOD-SCID mice after BDC2.5 CD4<sup>+</sup> T cell transfer.**  
1148 BDC2.5 CD4<sup>+</sup> T cells were adoptively transferred into NOD-SCID mice on day 0 and  
1149 euthanized on day 5, 6, 7, 8 or 9. a, Pancreases of representative mice from each group  
1150 are shown stained with hematoxylin-eosin (Magnification: Left column 2X, Right  
1151 columns 20X). Islets from an unmanipulated mouse show no cell infiltration and are  
1152 distinctly separated from adjacent acinar tissue (top row). Immune cell infiltration of  
1153 islets was observed at day 5. Infiltrating cells localized to the ductal pole of the islet and  
1154 connective tissue. At day 6 and 7, infiltrating cells have surrounded and invaded into  
1155 islets, which show compromised borders. By day 8 and 9, the architecture of islets has  
1156 been destroyed by massive cell infiltration. All mice were diabetes-free at each time  
1157 point. b, Kaplan-Meier curve shows the time course of diabetes development in mice  
1158 transplanted with 300,000 BDC2.5 T cells on day 0. Data are combined from four  
1159 independent experiments.

1160

### 1161 **Supplementary Figure 5 (Corresponding to Fig 5): Mice infused with specific**

1162 <sup>5M</sup>CAR-CTLs remain normoglycemic, maintain body weight, and eliminate target T  
1163 cells. BDC2.5 CD4<sup>+</sup> T cells were adoptively transferred into NOD SCID mice on day 0.  
1164 On day 7 the mice were treated with either control (GPI:I-A<sup>g7</sup>) <sup>5M</sup>CAR-CTLs, specific

1165 (RLGL-WE14:I-A<sup>g7</sup>) <sup>5M</sup>CAR-CTLs, or left untreated (BDC2.5 only). **a**, Blood glucose  
1166 levels and **b**, weight changes of recipients are shown. Weight change was calculated on  
1167 the basis of the weight at day 0. **a,b**, Data shows the combined results from two  
1168 independent experiments. **c**, Representative dot plots show frequencies of targets and  
1169 <sup>5M</sup>CAR-CTLs in spleens or pLNs of treated and untreated mice. Diabetic mice were  
1170 euthanized and analyzed one day after they developed diabetes (day 11 for mice  
1171 represented on plots). Diabetes-free mice were analyzed at the experimental endpoint,  
1172 day 36. Data represent two independent experiments. Numbers of mice/group is  
1173 indicated in the figure.

1174  
1175 **Supplementary Figure 6 (Corresponding to Fig 6): Enumeration of <sup>5M</sup>CAR-CTLs**  
1176 **and BDC2.5 CD4<sup>+</sup> T cells in the spleen.** NOD-SCID mice received BDC2.5 CD4<sup>+</sup> T  
1177 cells on day 0 and were either treated on day 7 with control (GPI:I-A<sup>g7</sup>) <sup>5M</sup>CAR-CTLs, or  
1178 specific (RLGL-WE14:I-A<sup>g7</sup>) <sup>5M</sup>CAR-CTLs, or were euthanized pre-treatment. Treated  
1179 groups were euthanized on day 8, 10, 15 or 36. Flow cytometry was used to determine  
1180 the frequency and number of mRasp<sup>+</sup> CD4<sup>+</sup> BDC2.5 T cell target and GFP<sup>+</sup> <sup>5M</sup>CAR-  
1181 CTLs in the spleens. Representative dot plots show frequencies of BDC2.5 CD4<sup>+</sup> T cells  
1182 and <sup>5M</sup>CAR-CTLs (top panels, pre-gated on live, CD11b<sup>-</sup> cells). Graphs show the  
1183 number of BDC2.5 CD4<sup>+</sup> T cells (left) or change in the number of <sup>5M</sup>CAR-CTLs (right).  
1184 Data show results combined from two independent experiments as mean ± SD. 3-6  
1185 mice were analyzed for each group and time point (\*p < 0.05 by unpaired, two-tailed *t*-  
1186 test between the control and specific <sup>5M</sup>CAR-CTLs at each time point). † means no  
1187 data.

1188  
1189 **Supplementary Figure 7 (Corresponding to Fig 7): Long-term persistence of**  
1190 **<sup>5M</sup>CAR-CTLs in diabetes-free NOD mice.** Newborn NOD mice were treated with  
1191 control (GPI:I-A<sup>g7</sup>) <sup>5M</sup>CAR-CTLs, a mixture of <sup>5M</sup>CAR-CTLs (INSB:I-A<sup>g7</sup>, HIP2.5:I-A<sup>g7</sup>,  
1192 HIP6.9:I-A<sup>g7</sup> and RLGL-WE14:I-A<sup>g7</sup>), or left untreated and were monitored for  
1193 glycosuria. Diabetes-free male and female mice were euthanized and lymphocytes were  
1194 analyzed by flow cytometry at the conclusion of the experiment shown in Fig 7 (>315  
1195 days). **a**, Representative dot plots show the frequencies of long-term engrafted  
1196 GFP<sup>+</sup>CD8<sup>+</sup> <sup>5M</sup>CAR-CTLs within the spleens plus the pLNs. **b**, The spleens and pLNs of  
1197 boosted female recipients were harvested 2 days after BDC2.5 transfer and analyzed  
1198 as a mixed sample. An age-matched unmanipulated female NOD mouse was used as a  
1199 control. The proportion of mice with long-term engrafted <sup>5M</sup>CAR-CTLs in each subgroup  
1200 of diabetes-free recipients is shown.

1201



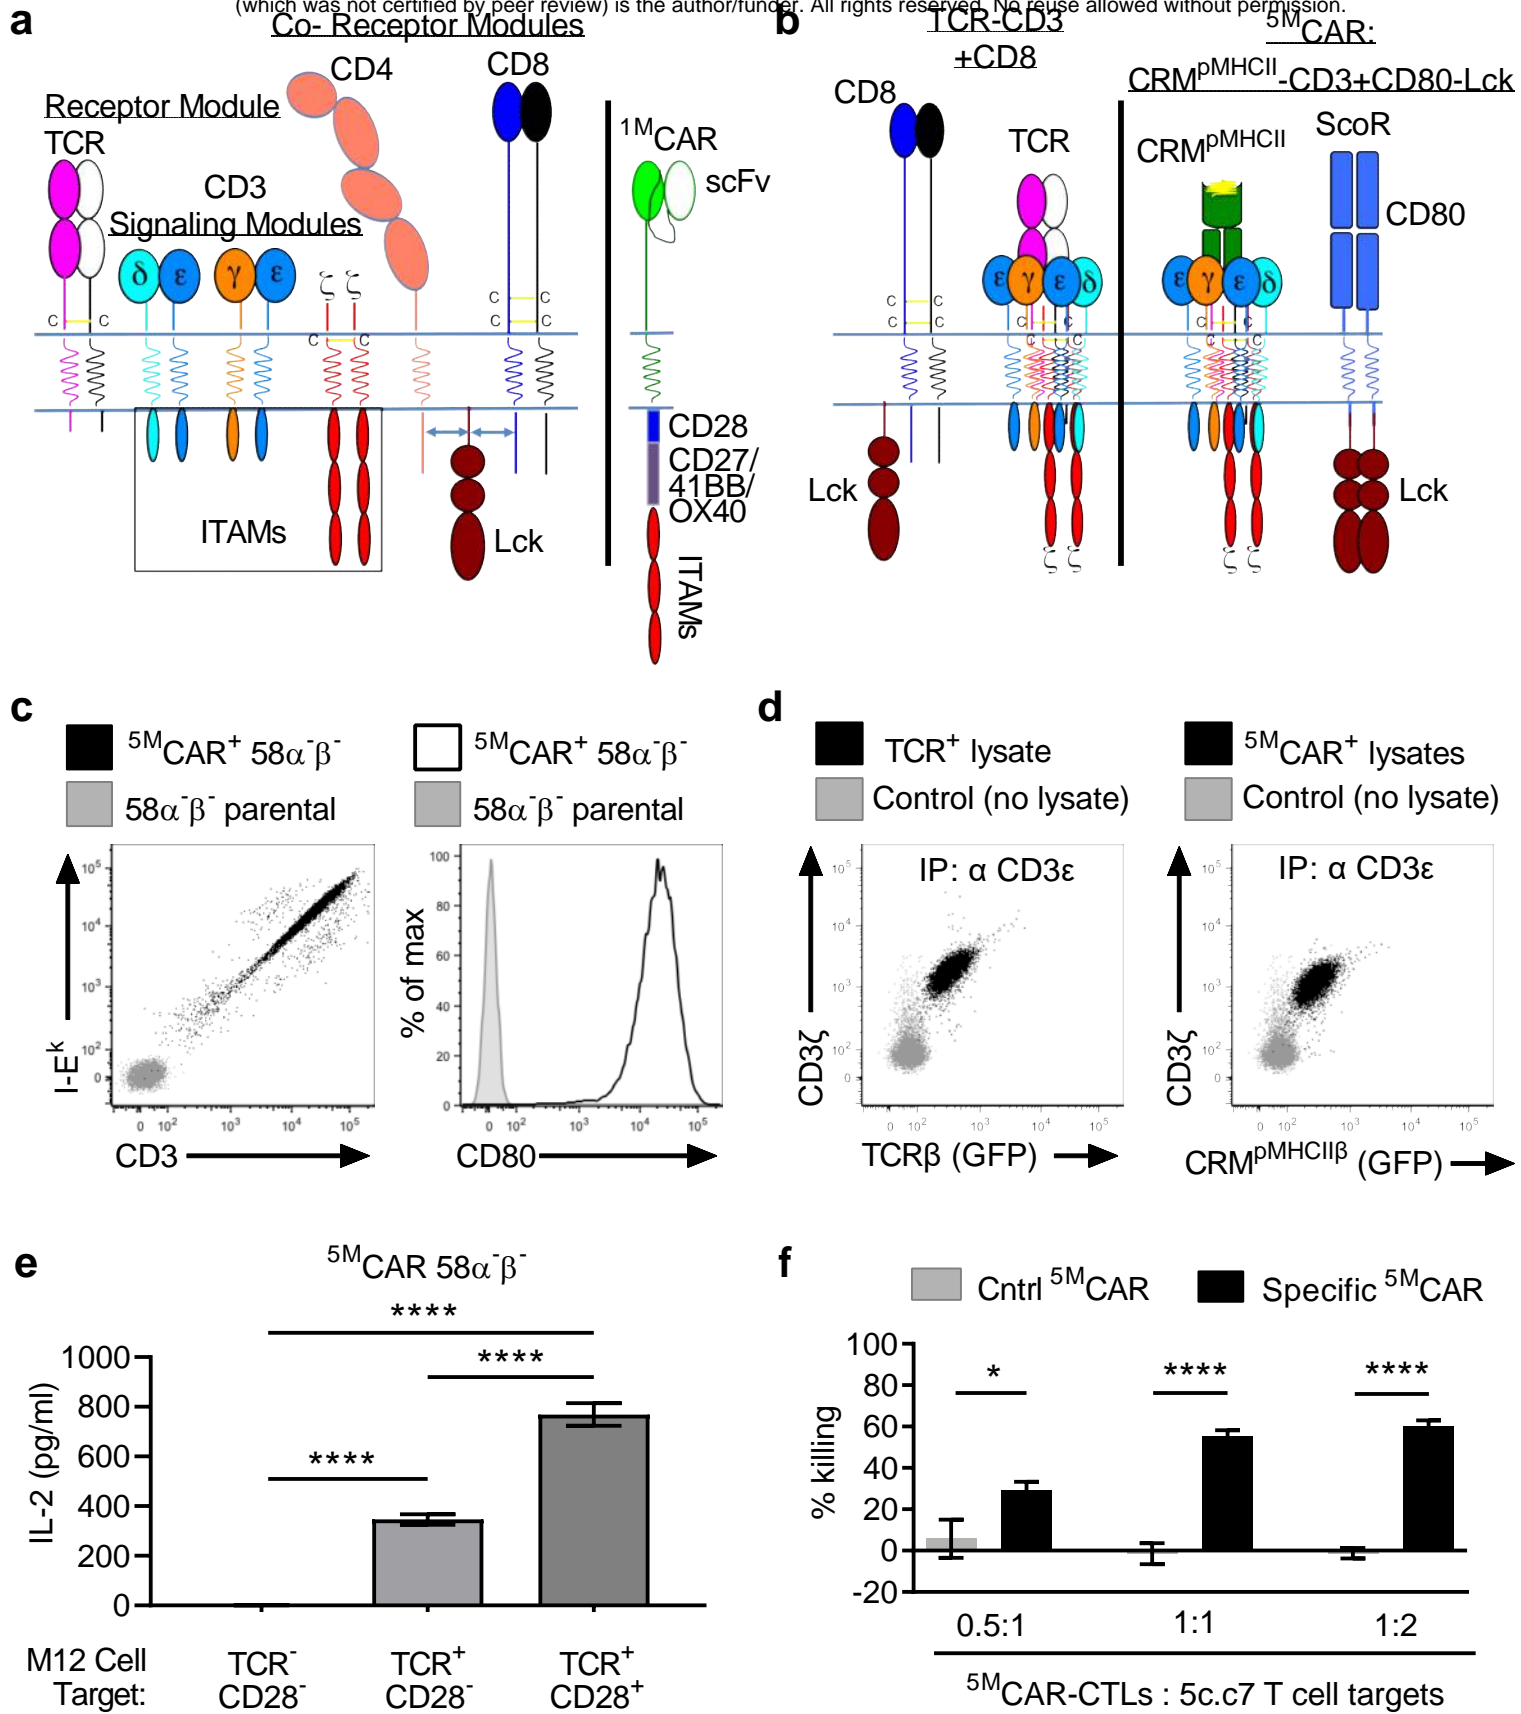

**Figure 1**

**a**

bioRxiv preprint doi: <https://doi.org/10.1101/2020.01.24.916932>; this version posted January 25, 2020. The copyright holder for this preprint (which was not certified by peer review) is the author/funder. All rights reserved. No reuse allowed without permission.

**in vitro killing of BDC2.5 T cells****in vitro killing of NOD T cells**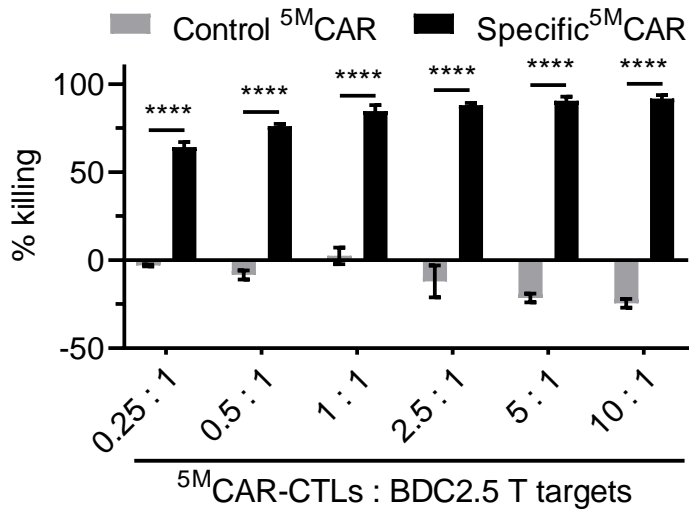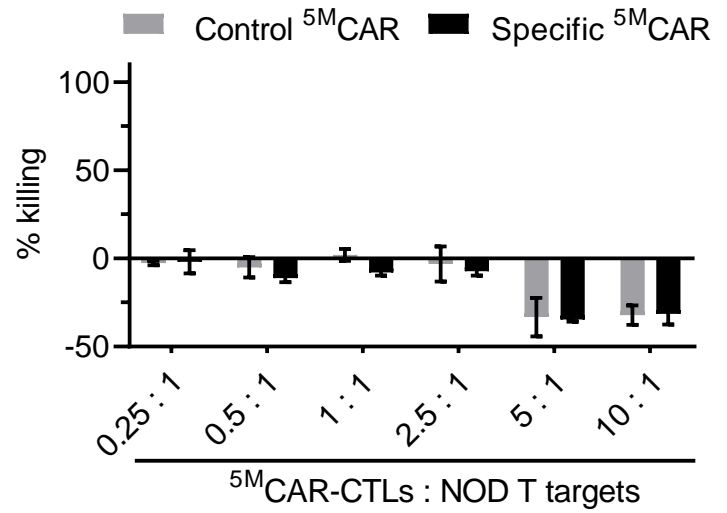**b**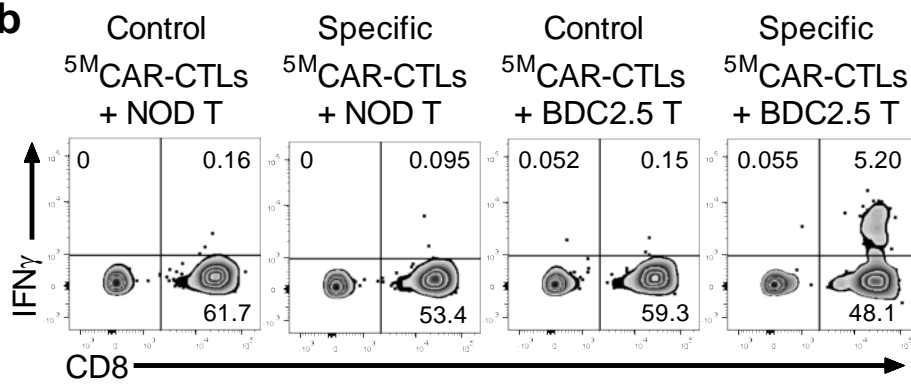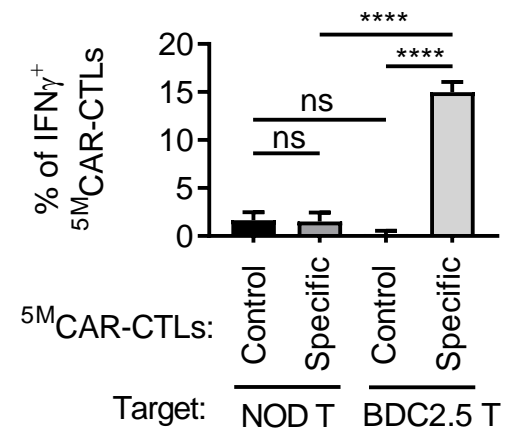**c**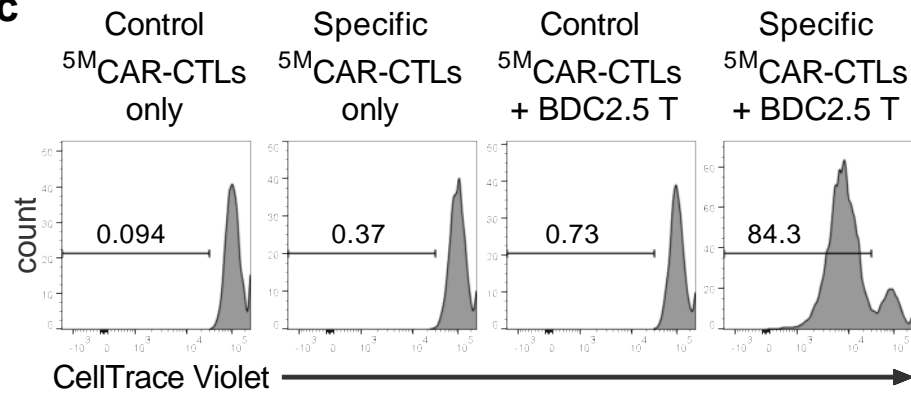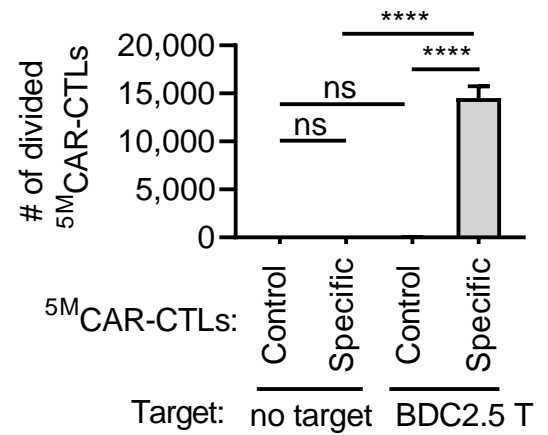**d**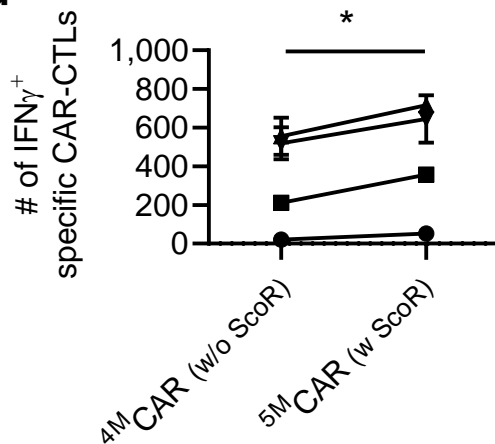**e**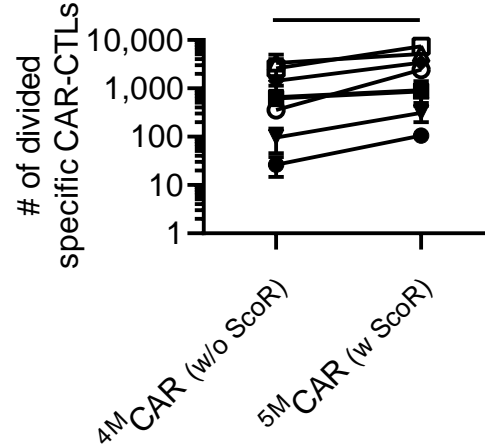**Figure 2**

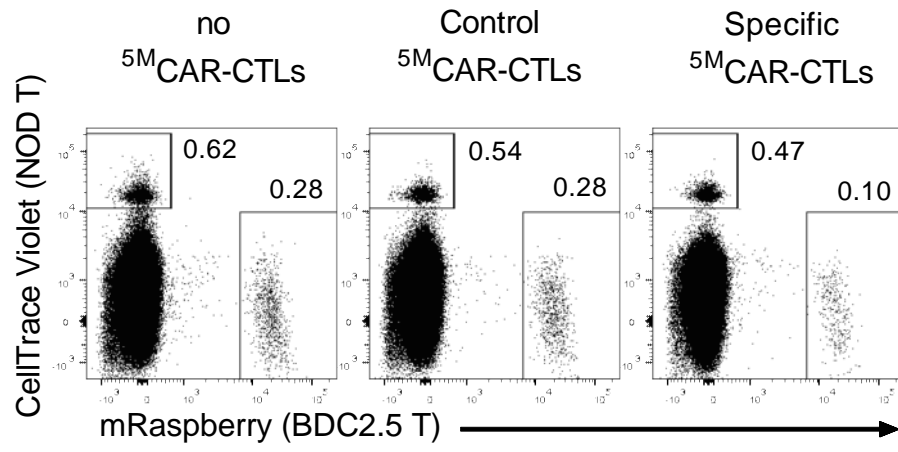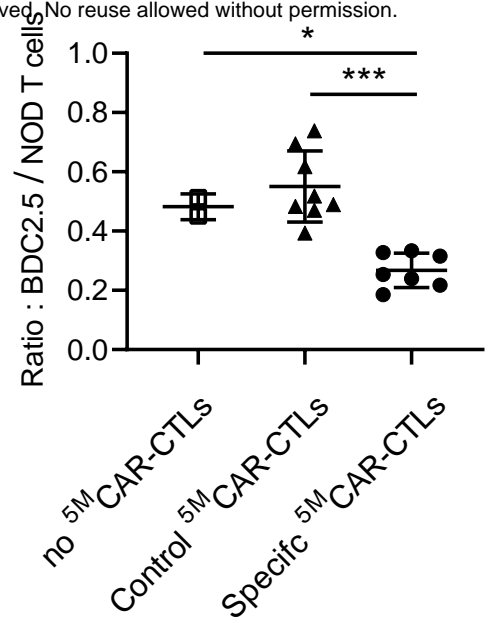

Figure 3



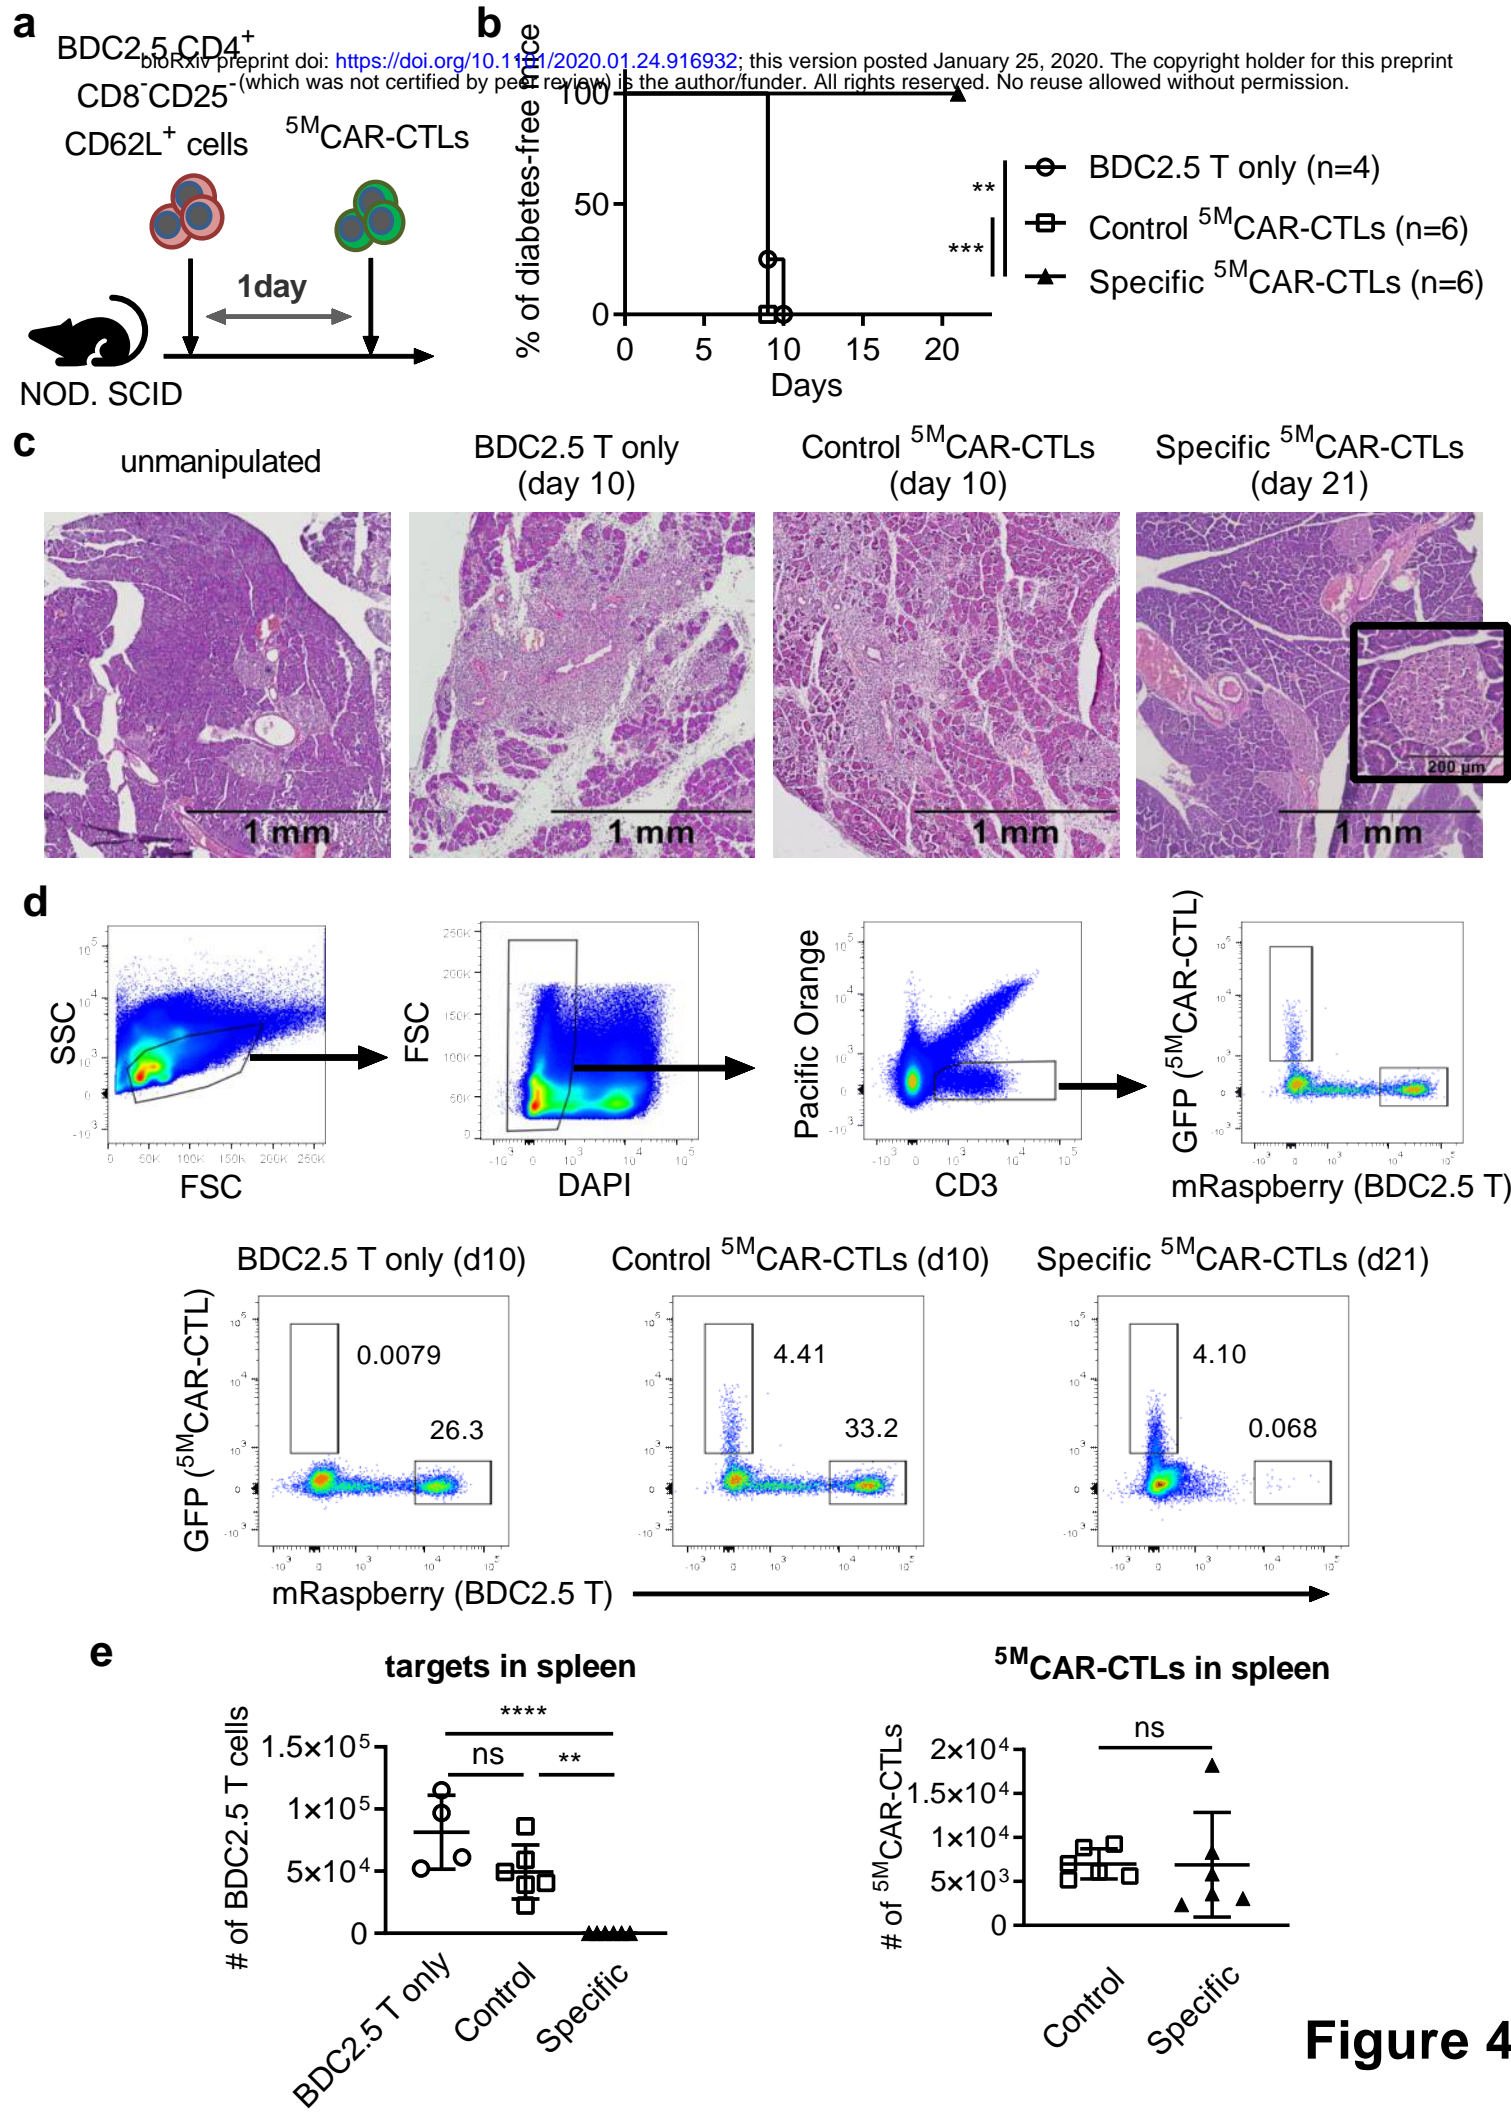

**Figure 4**

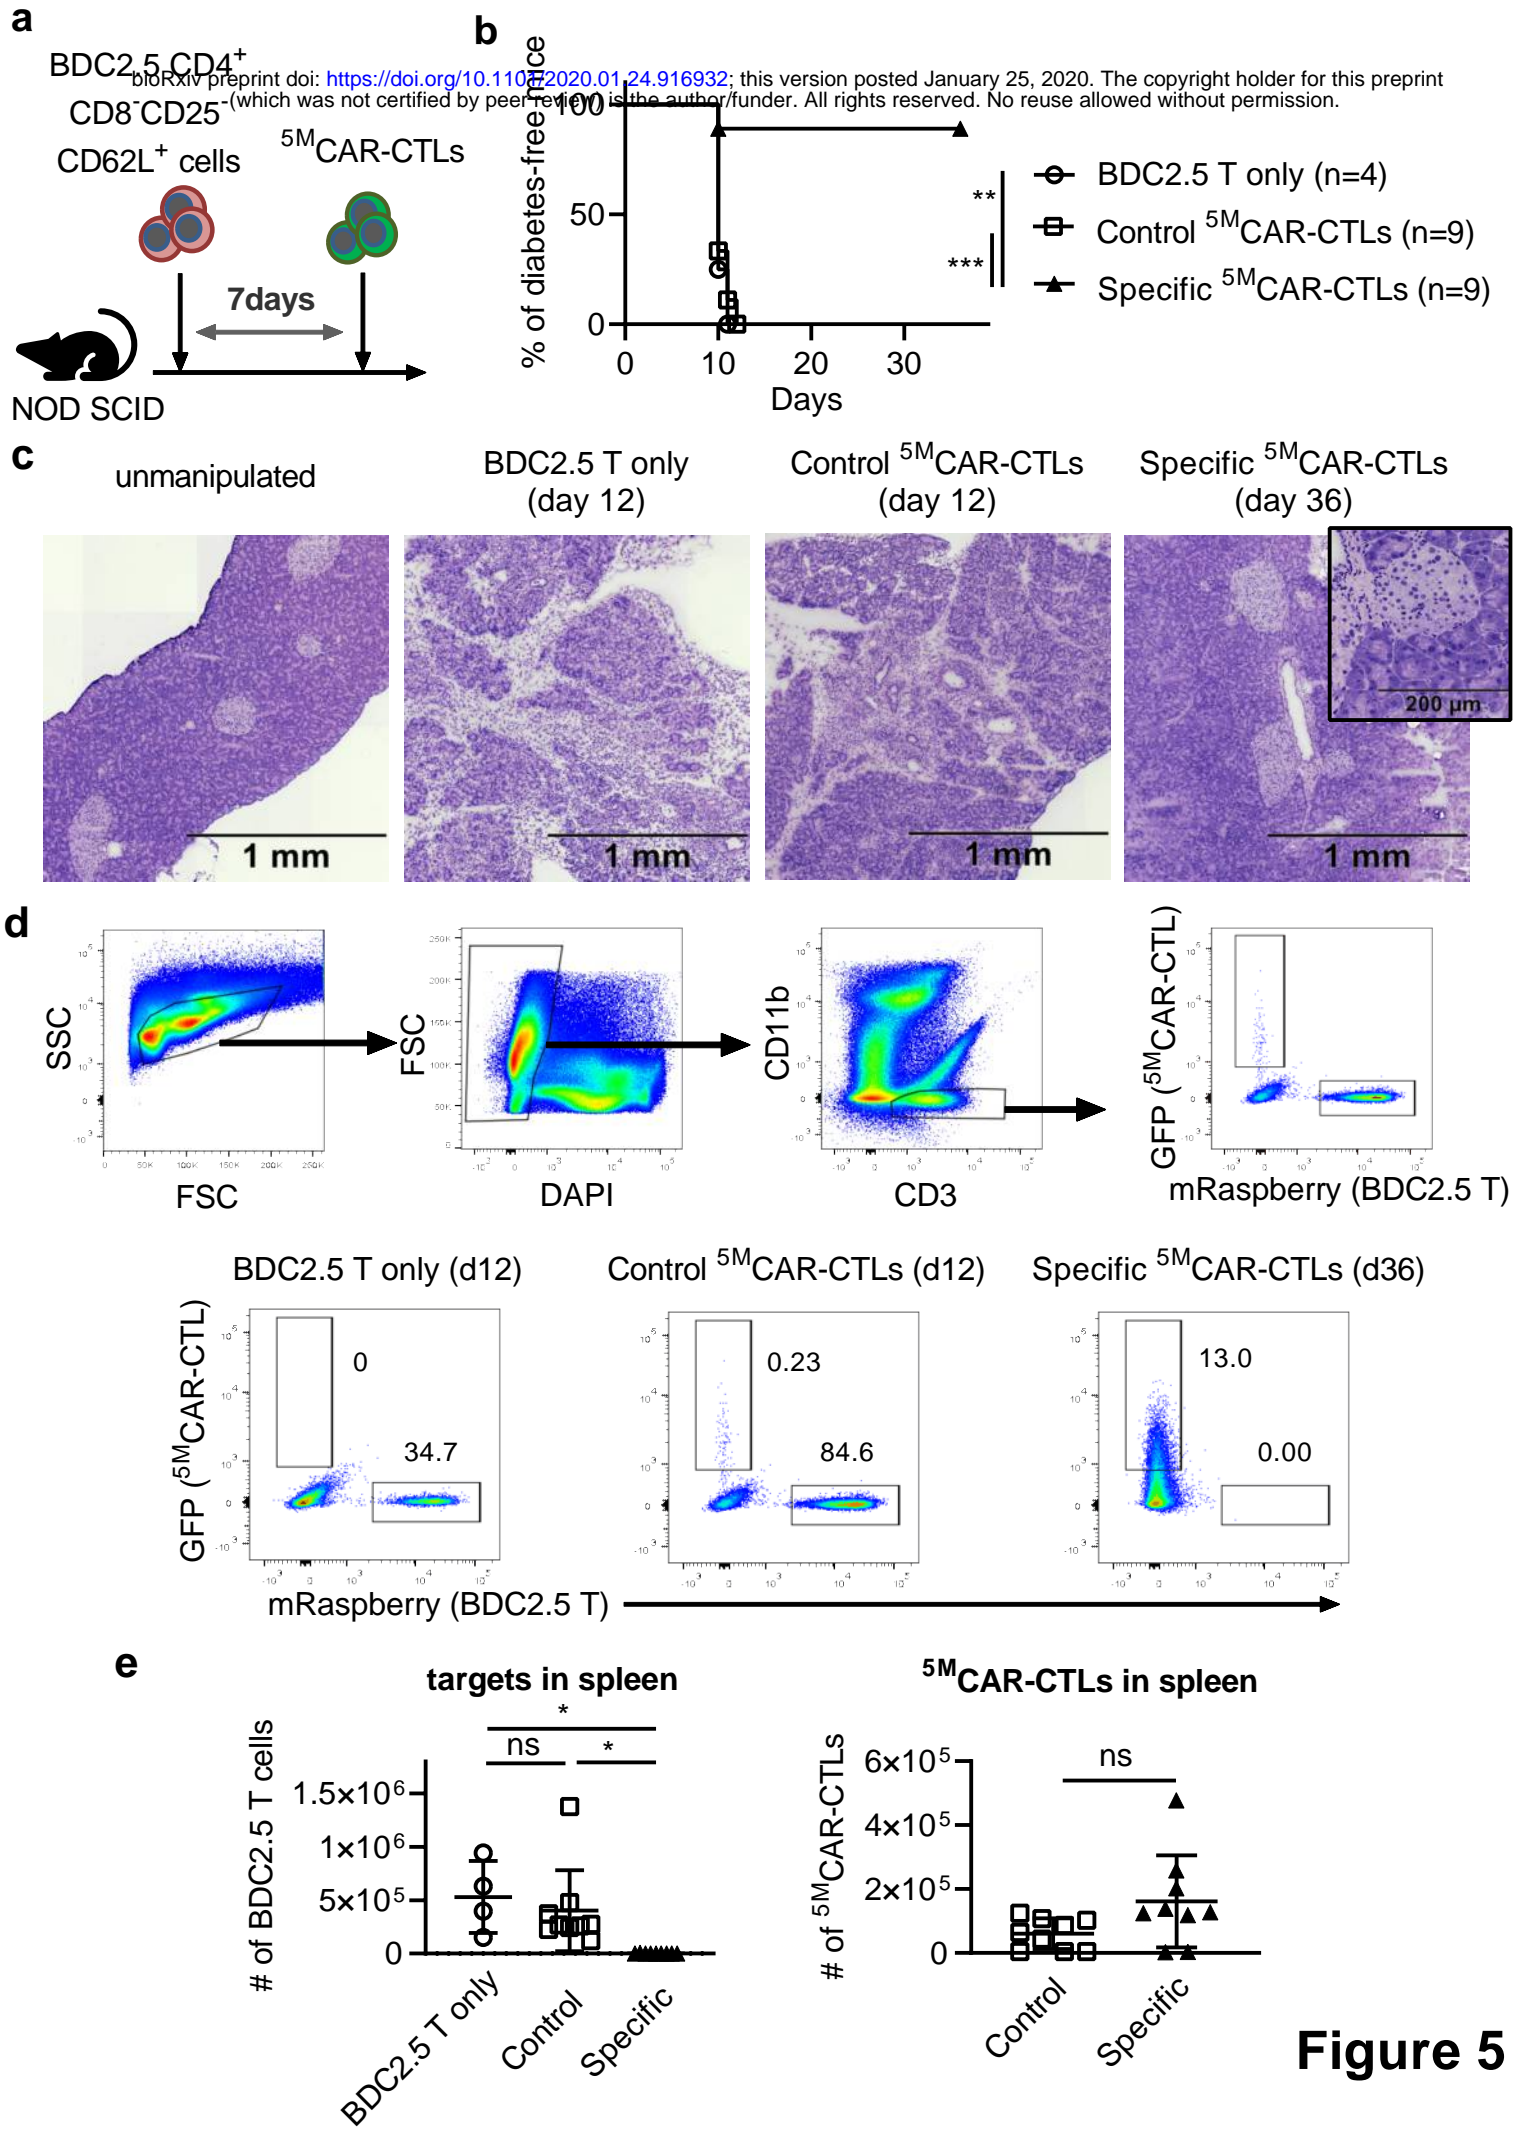

**Figure 5**

**a**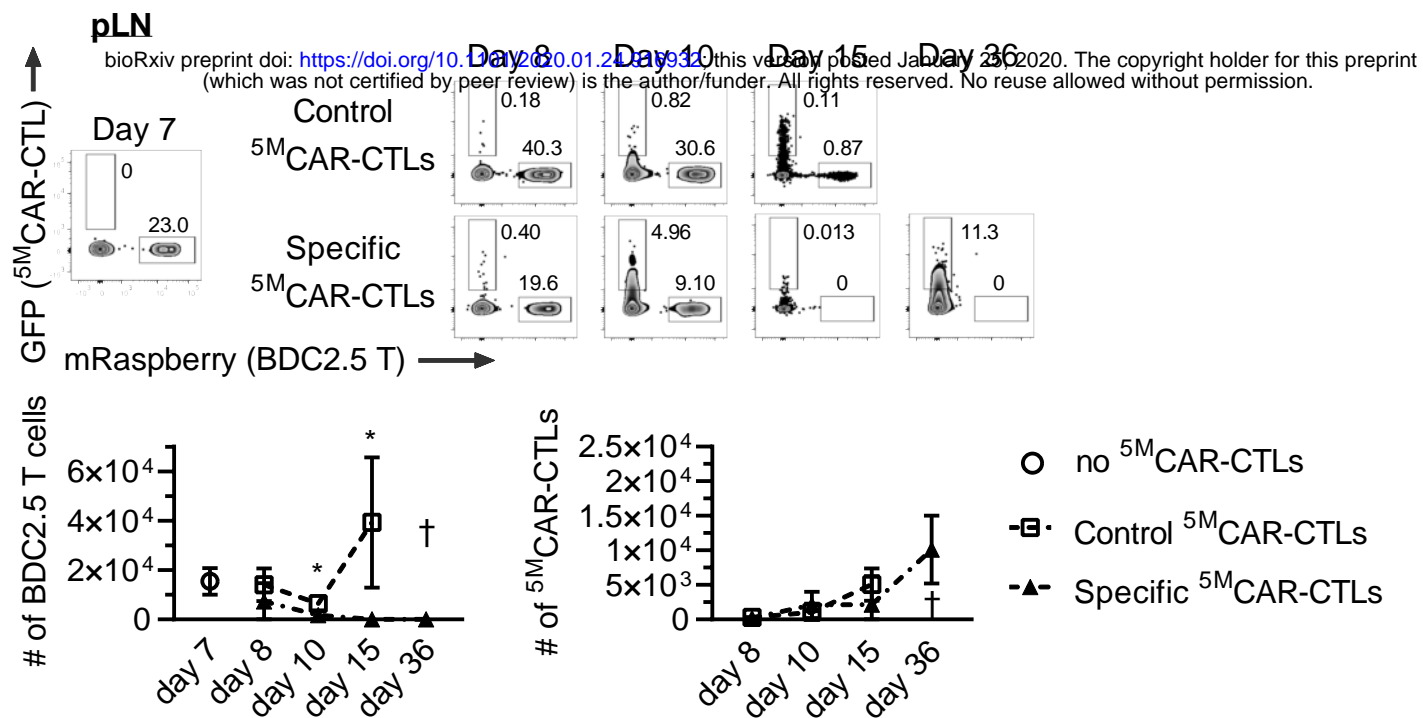**b**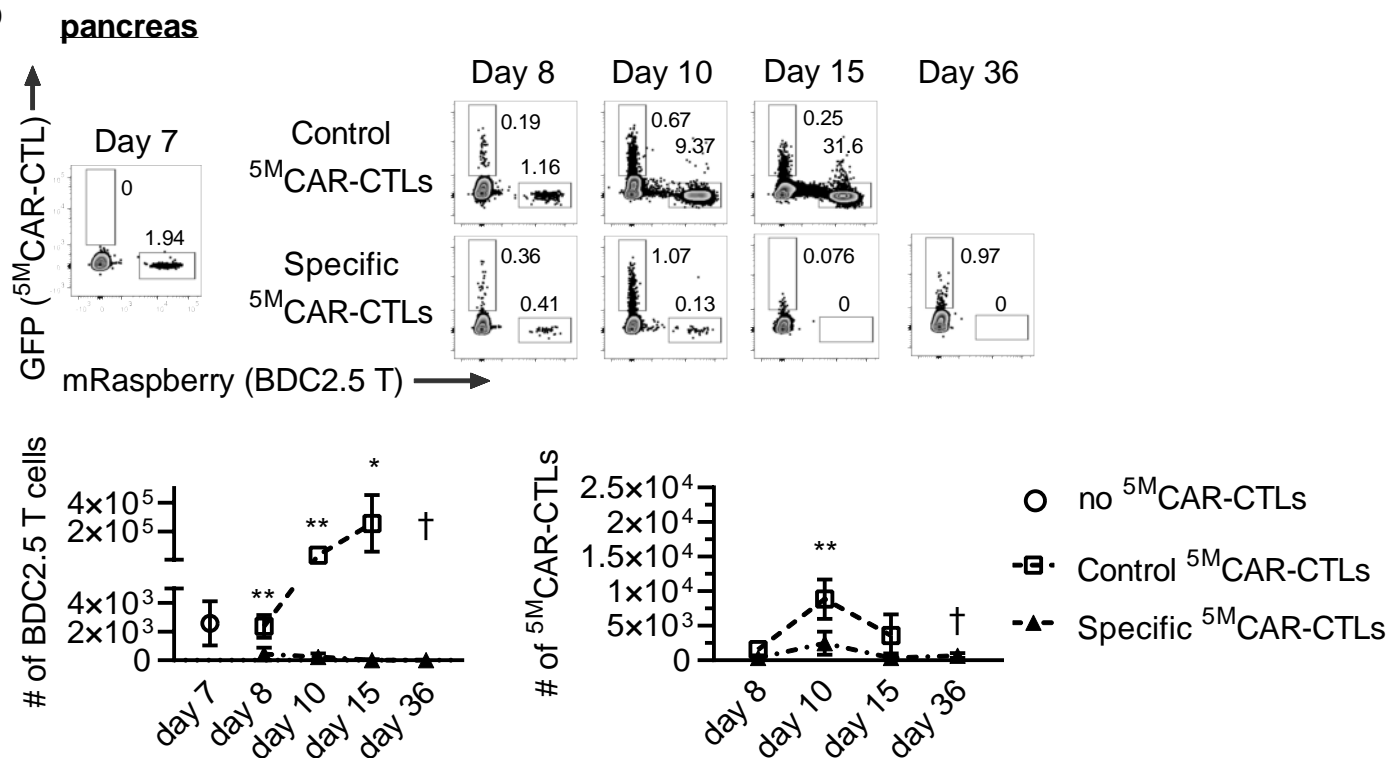**Figure 6**

**a**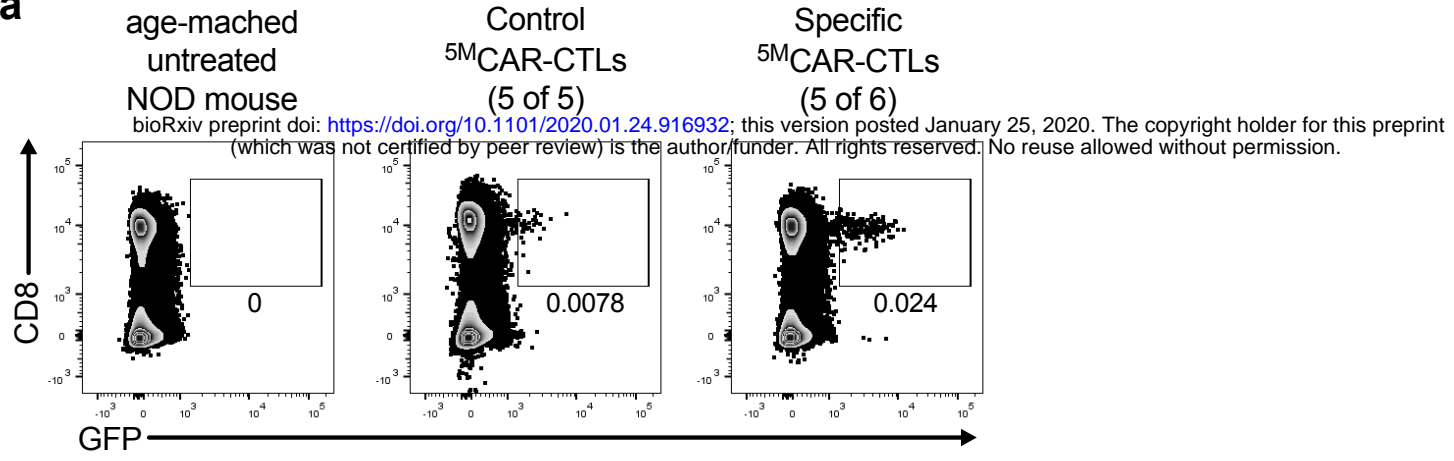**b**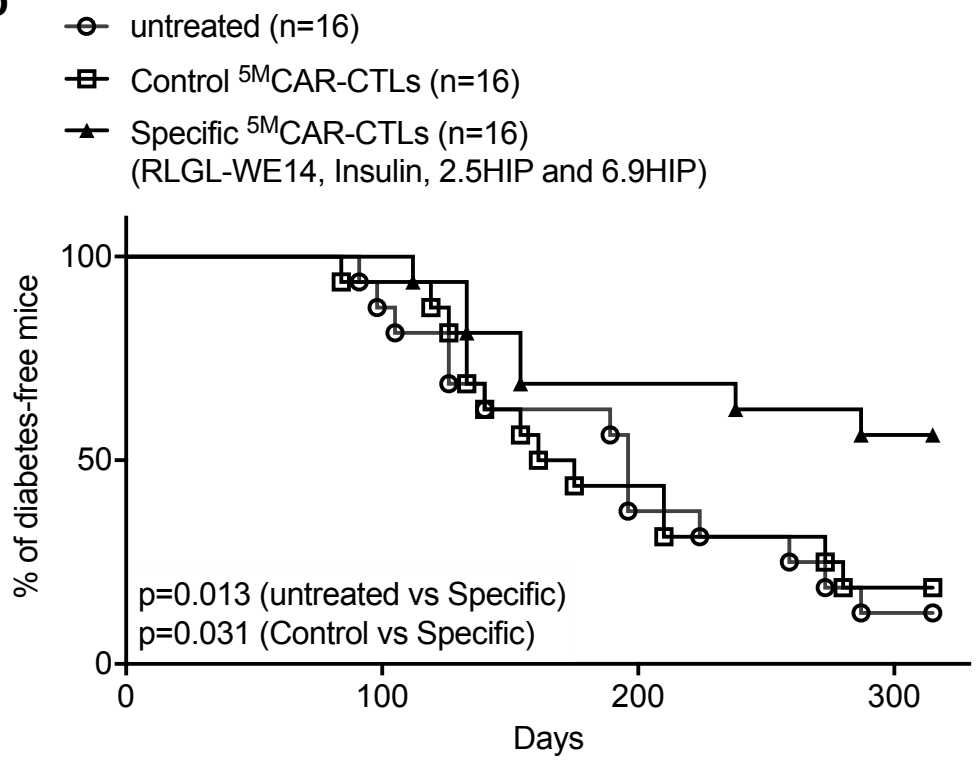**Figure 7**



# Redirected T cell

# CD4<sup>+</sup> or CD8<sup>+</sup> Target T cell

bioRxiv preprint doi: <https://doi.org/10.1101/2020.01.24.916932>; this version posted January 25, 2020. The copyright holder for this preprint (which was not certified by peer review) is the author/funder. All rights reserved. No reuse allowed without permission.

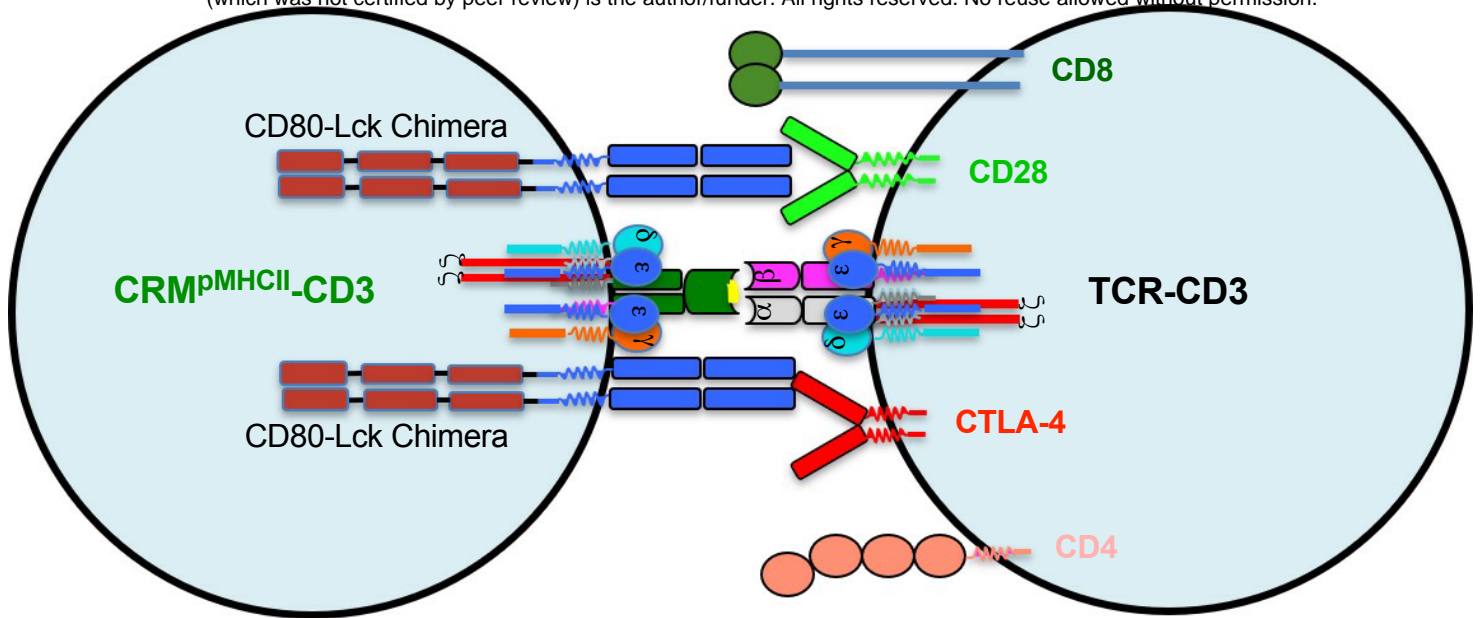

Supplemental Fig 1

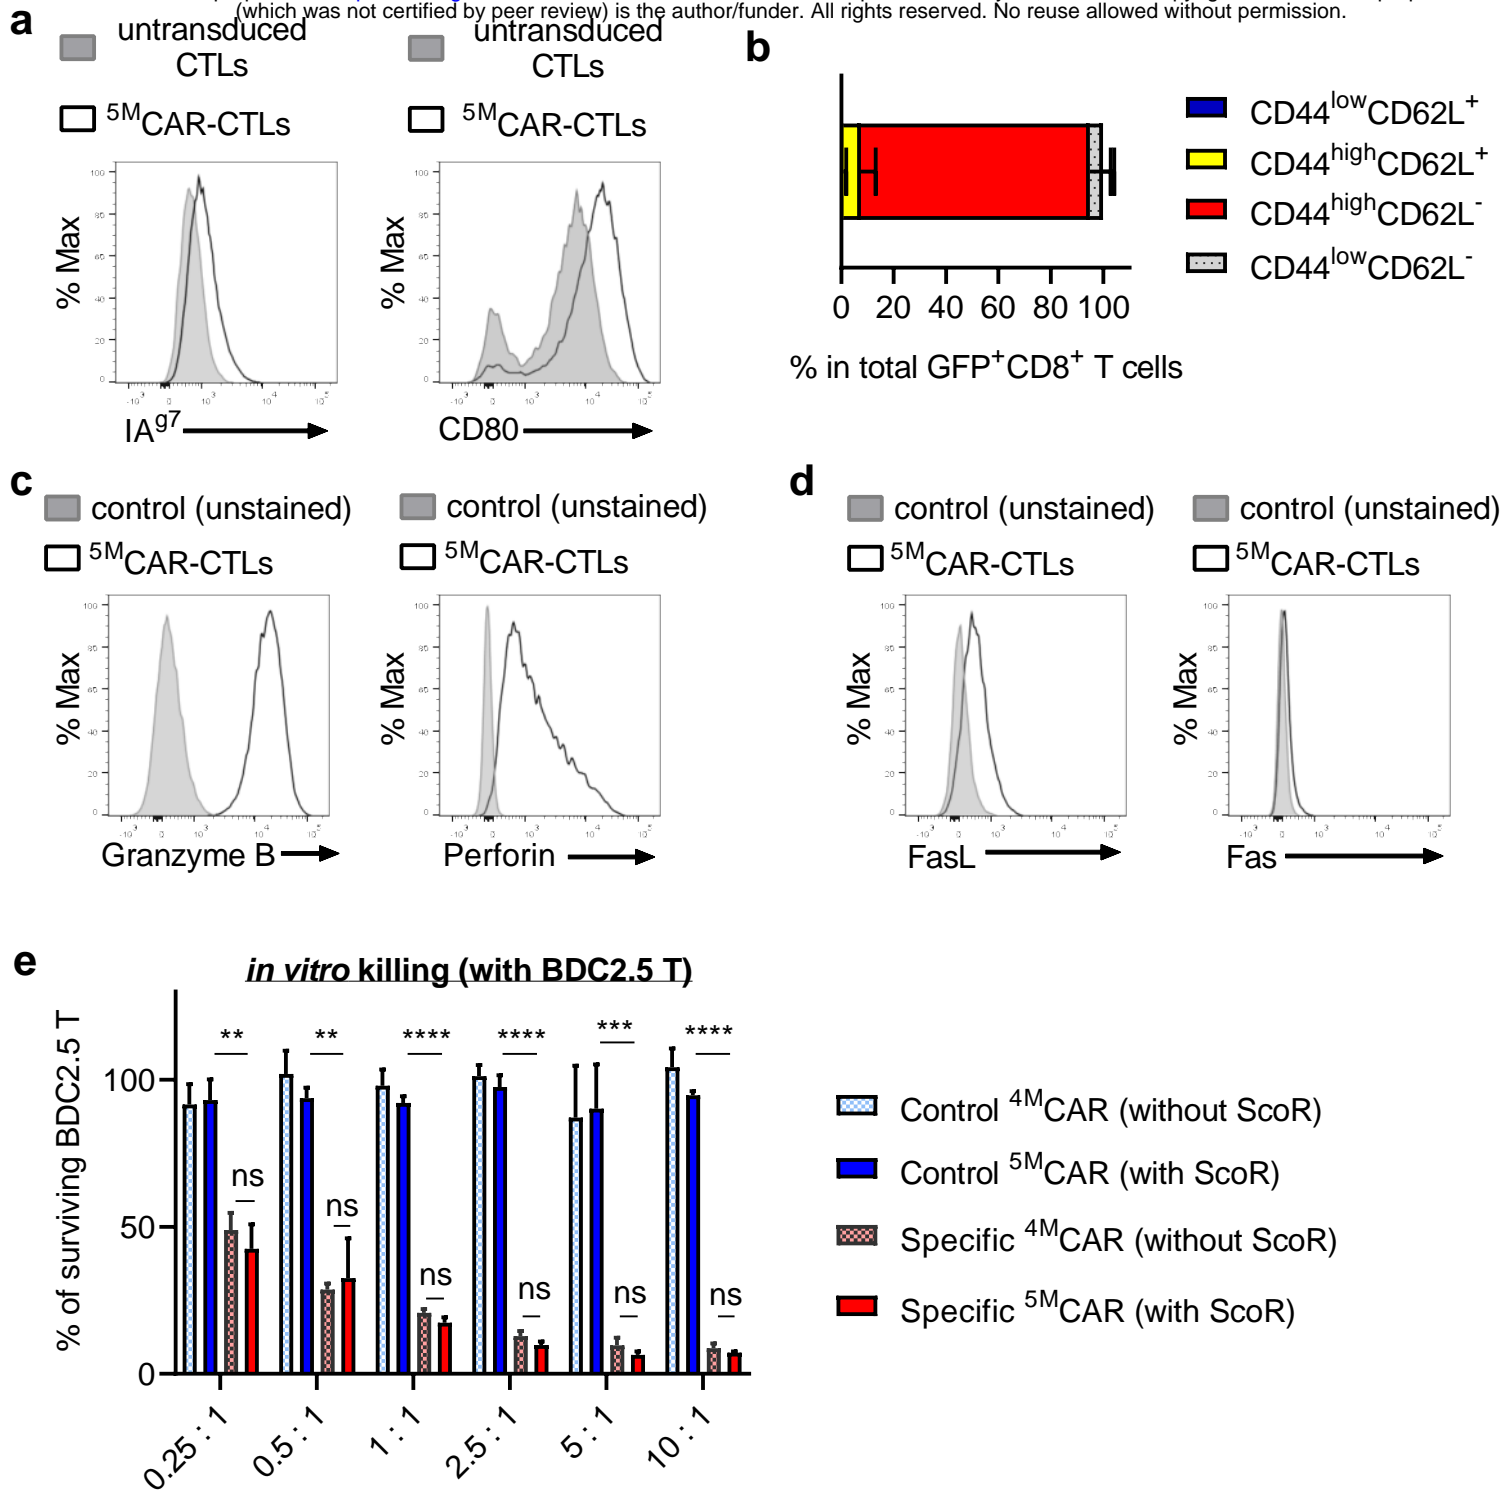

No 5M CAR-CTL

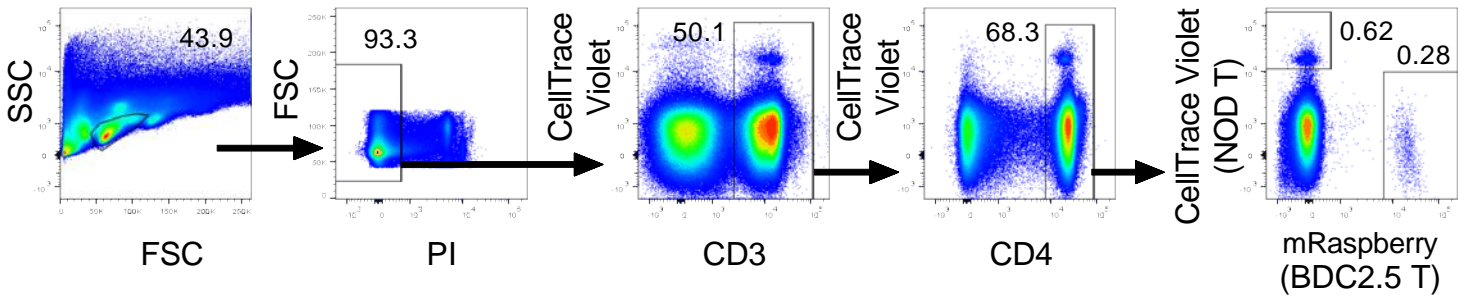

Control 5M CAR-CTL

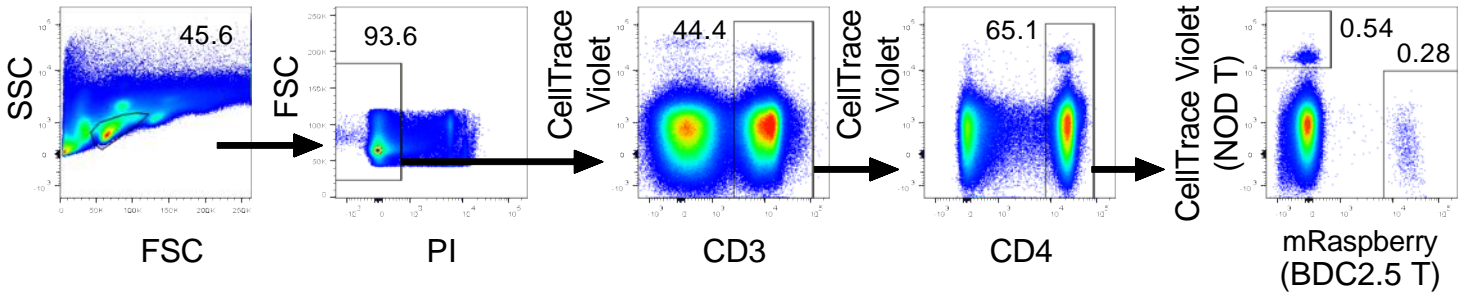

Specific 5M CAR-CTL

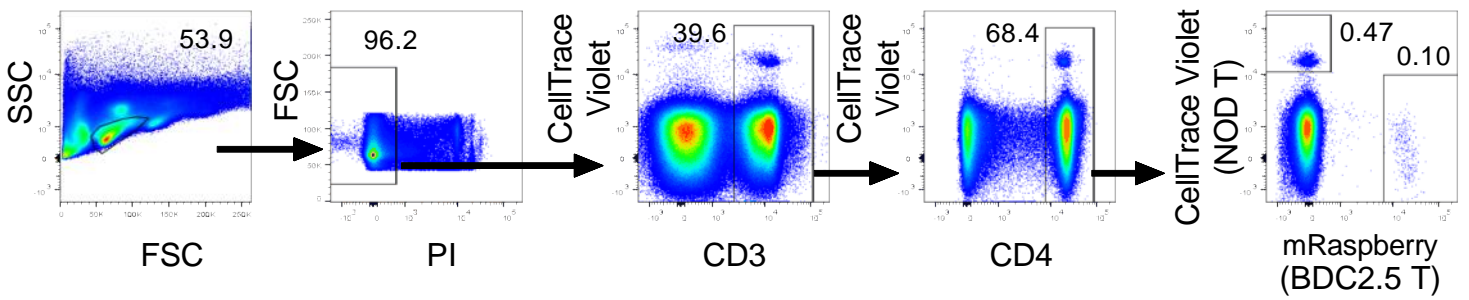



**a**

x 2

x 20

bioRxiv preprint doi: <https://doi.org/10.1101/2020.01.24.916932>; this version posted January 25, 2020. The copyright holder for this preprint (which was not certified by peer review) is the author/funder. All rights reserved. No reuse allowed without permission.

un-manipulated

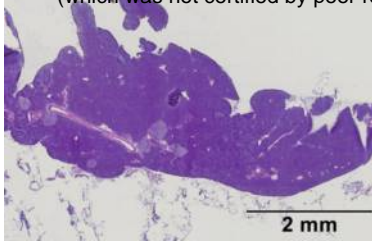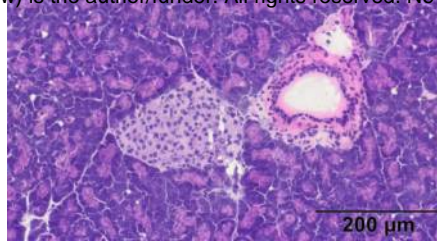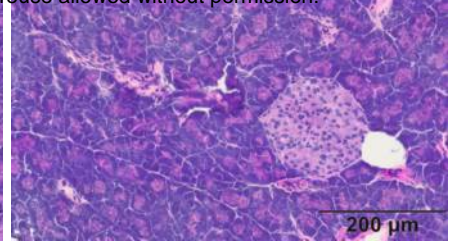

day 5

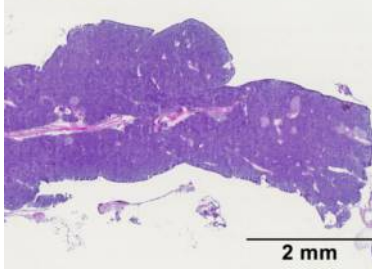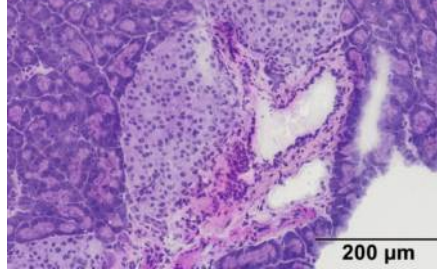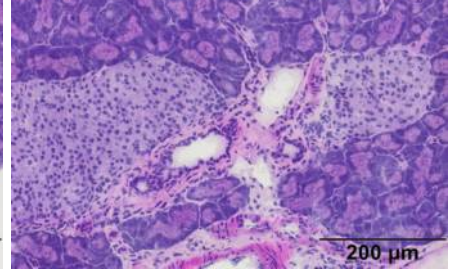

day 6

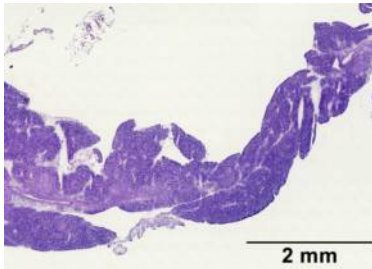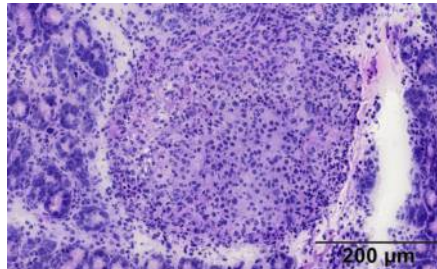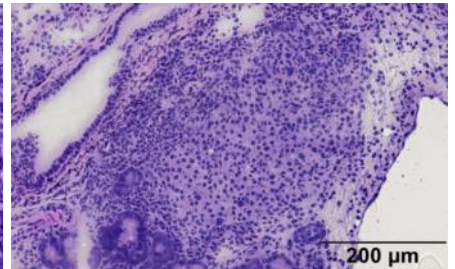

day 7

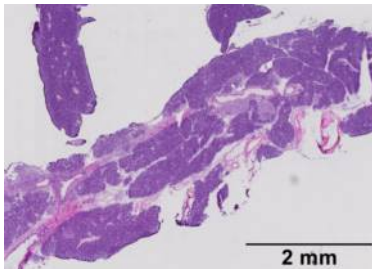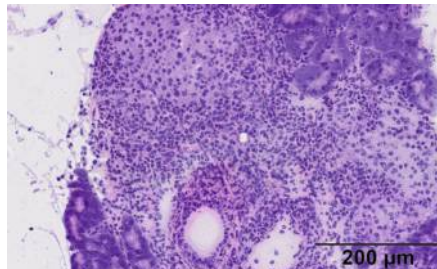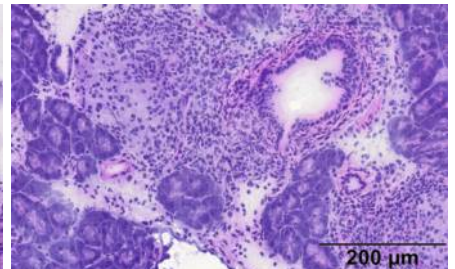

day 8

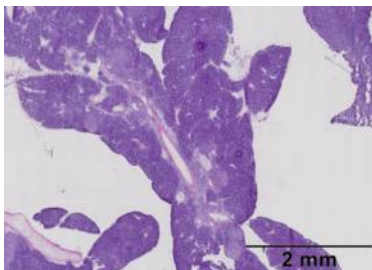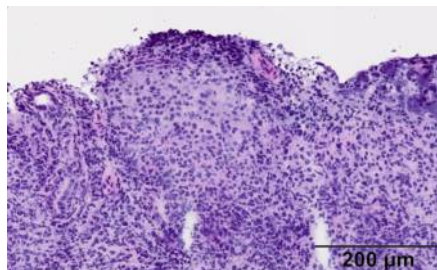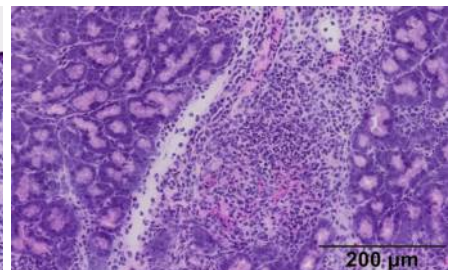

day 9

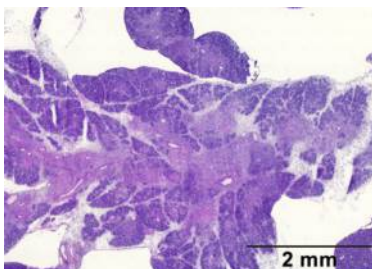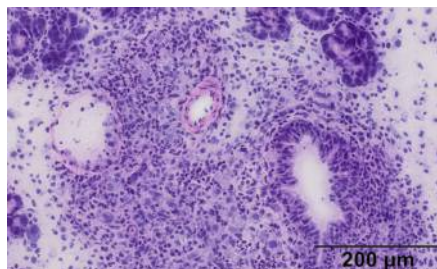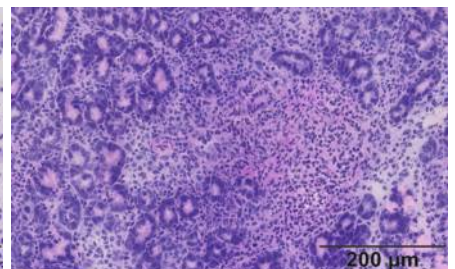**b**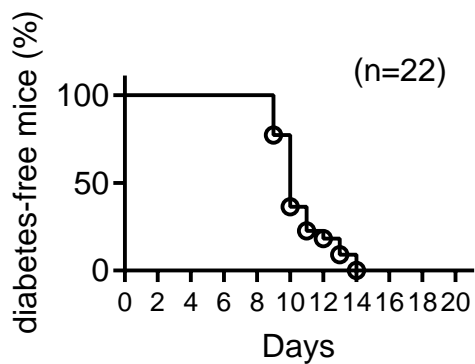**supplementary Fig 4**



**a**

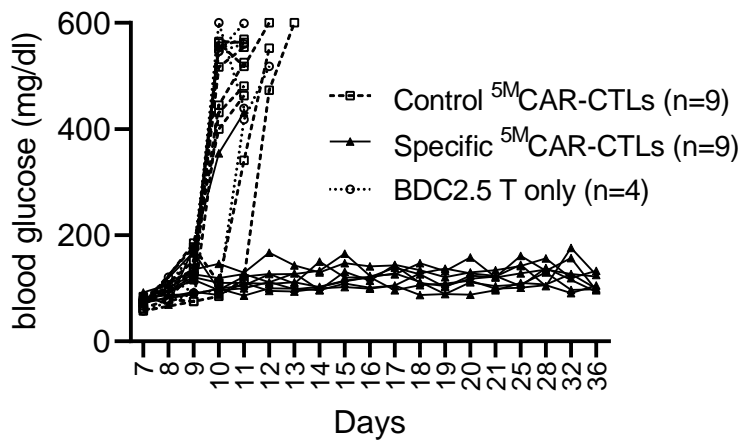

**b**

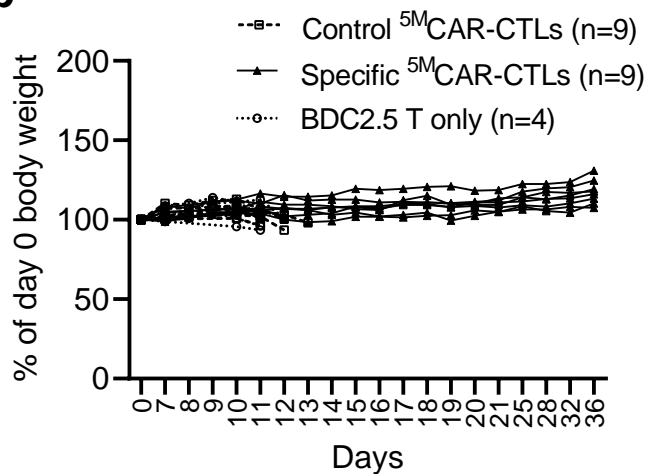

**c**

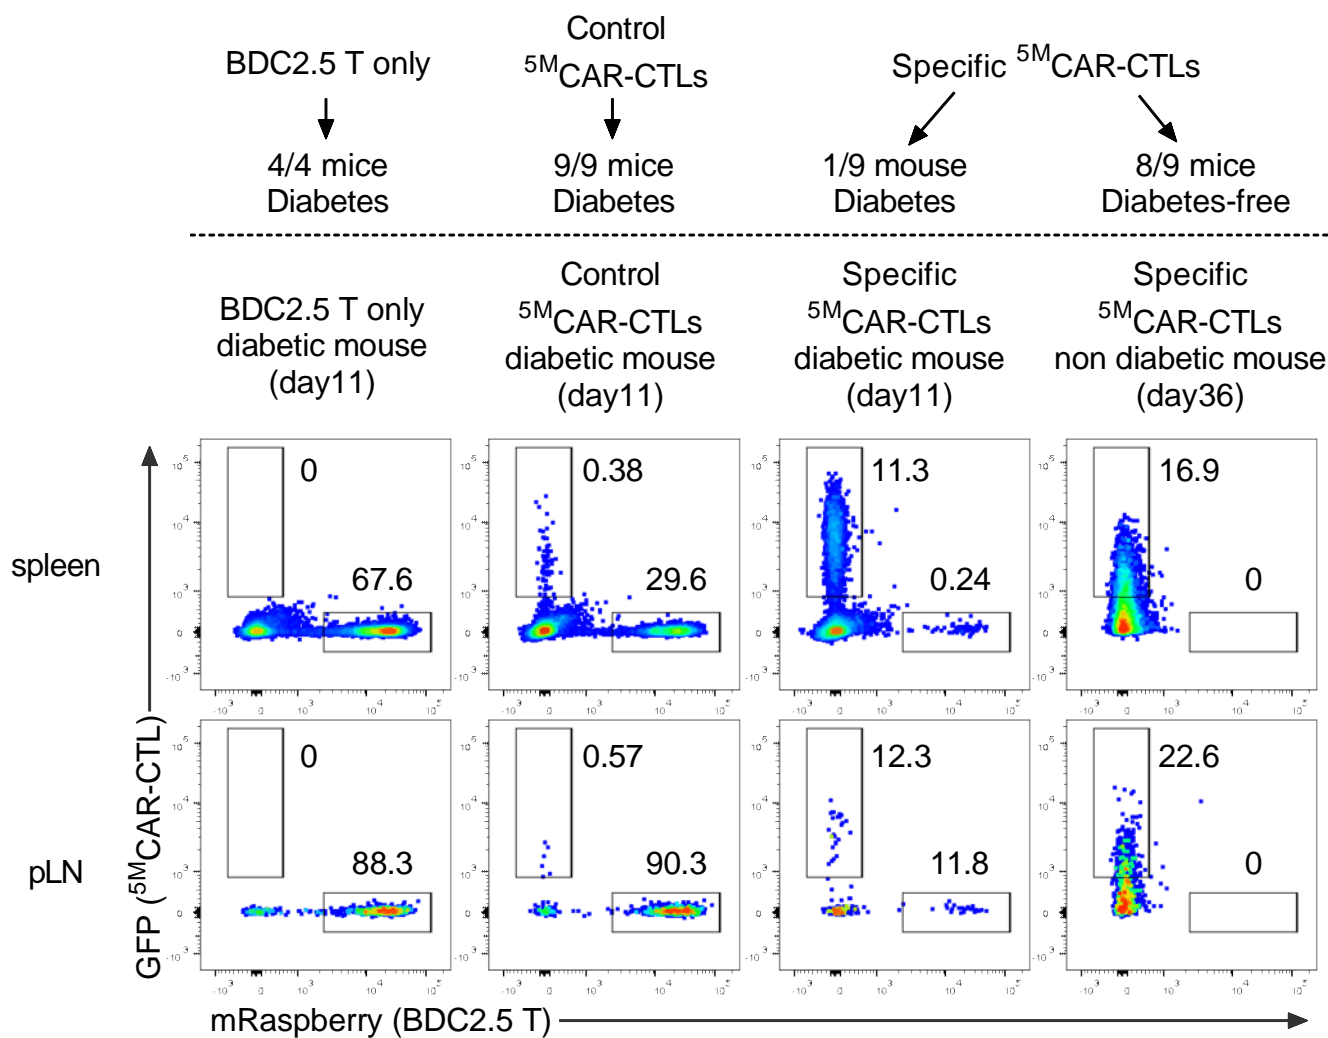

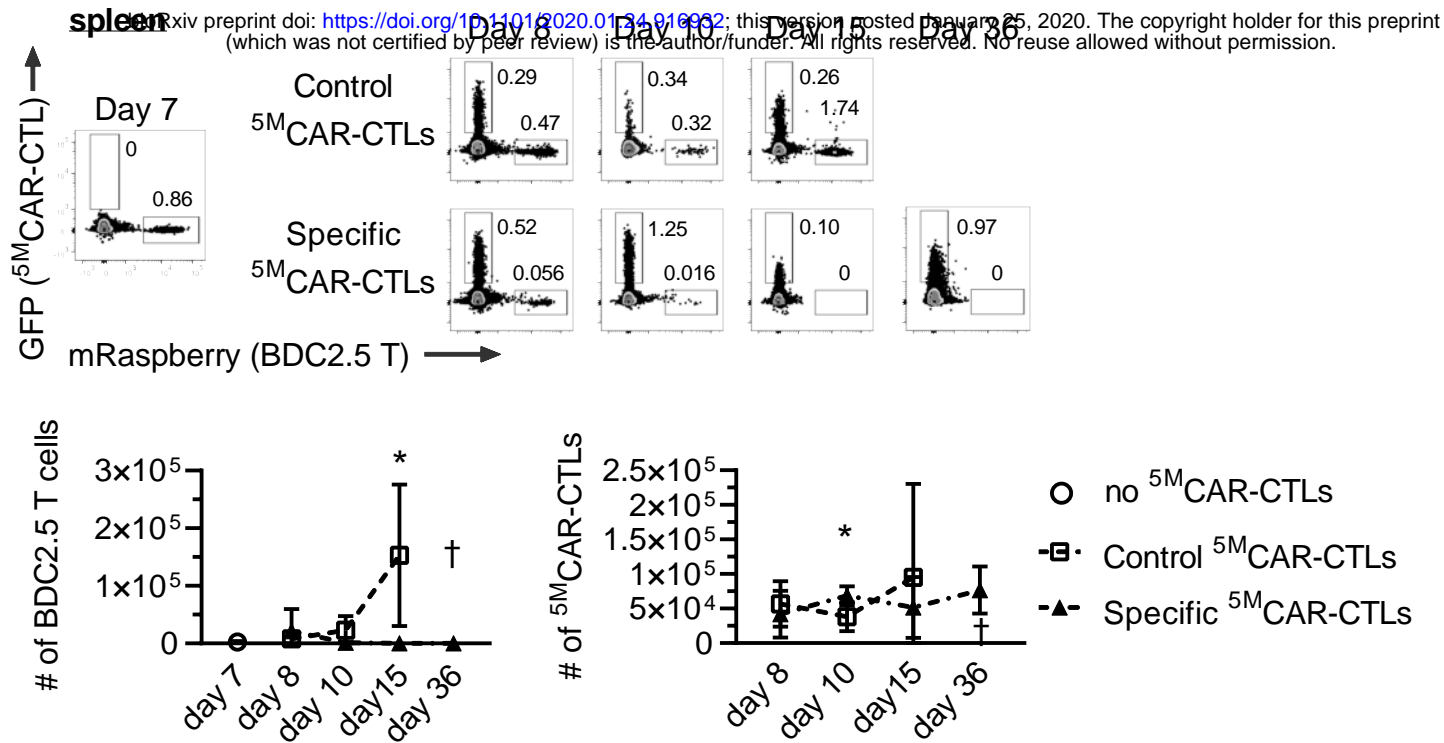

**a**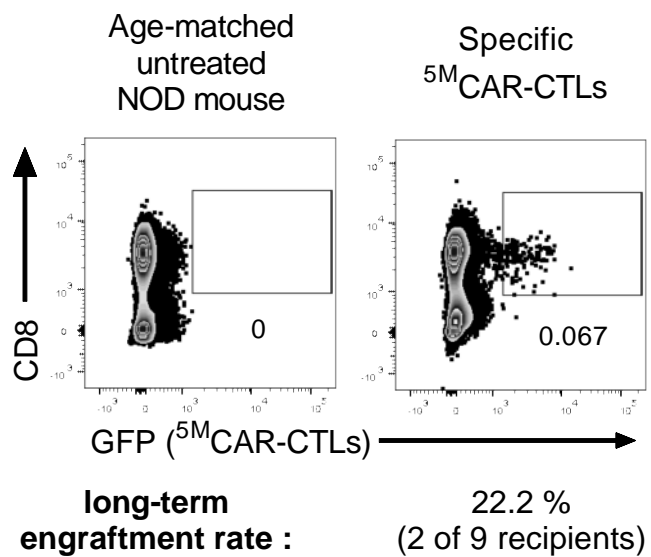**b**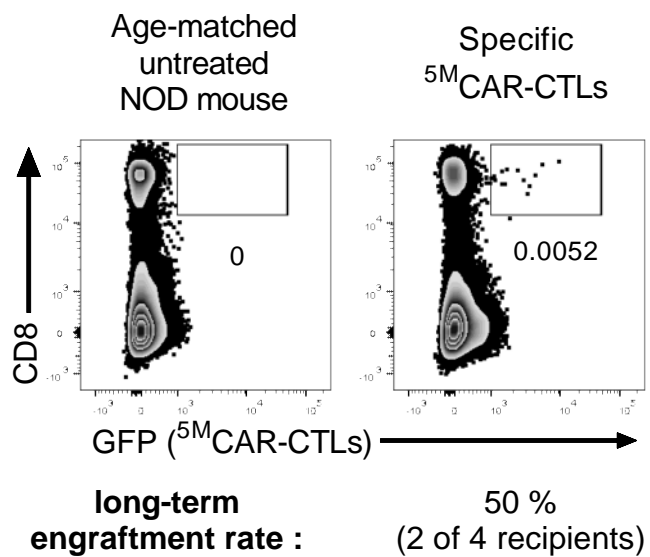

Source: https://www.biorxiv.org/content/10.1101/2020.01.24.916932v1.full.pdf
